# Supplementary material
Source: Research Square preprint supplement (doi:10.21203/rs.3.rs-9010570/v1)
Supplement: Supplementary file 1 [file a7fefa5a1a717da6db05cf96.xlsx]

## Sheet: Sheet1
Sequence_ID	TAX_LIN_1	TAX_LIN2	TAX_LIN_3	TAX_LIN_4	TAX_LIN_5	Location	Station_Code	domain	Special Information
ant_Ga0307396_100320011_LOV_HSFDNAbind_Haptohpyta/1-160	Eukaryota	Haptophyta	Phaeocystales	Phaeocystaceae	Phaeocystis	Polar	PS103_6	HSF-DNA-bind
ant_Ga0307396_101005311_LOV_HSFDNAbind_Haptophyta/1-154	Eukaryota	Haptophyta	Phaeocystales	Phaeocystaceae	Phaeocystis	Polar	PS103_6	HSF-DNA-bind
ant_Ga0307396_104788711_LOV_HSFDNAbind_Haptophyta/1-75	Eukaryota	Haptophyta	Prymnesiales	Chrysochromulinaceae	Chrysochromulina	Polar	PS103_6	HSF-DNA-bind
ant_Ga0307397_100021501_5xLOV_HisKA_HATPase_C_Responsereg_Haptophyta/1-146	Eukaryota	Haptophyta	Isochrysidales	Noelaerhabdaceae	Emiliania	Polar	PS103_7	HisKA-HATPase-Responsereg
ant_Ga0307397_100021501_5xLOV_HisKA_HATPase_C_Responsereg_Haptophyta/100-273	Eukaryota	Haptophyta	Isochrysidales	Noelaerhabdaceae	Emiliania	Polar	PS103_7	HisKA-HATPase-Responsereg
ant_Ga0307397_100021501_5xLOV_HisKA_HATPase_C_Responsereg_Haptophyta/226-400	Eukaryota	Haptophyta	Isochrysidales	Noelaerhabdaceae	Emiliania	Polar	PS103_7	HisKA-HATPase-Responsereg
ant_Ga0307397_100021501_5xLOV_HisKA_HATPase_C_Responsereg_Haptophyta/378-527	Eukaryota	Haptophyta	Isochrysidales	Noelaerhabdaceae	Emiliania	Polar	PS103_7	HisKA-HATPase-Responsereg
ant_Ga0307397_100021501_5xLOV_HisKA_HATPase_C_Responsereg_Haptophyta/482-655	Eukaryota	Haptophyta	Isochrysidales	Noelaerhabdaceae	Emiliania	Polar	PS103_7	HisKA-HATPase-Responsereg
ant_Ga0307397_100174691_SnoaL_LOV_Haptophyta/501-661	Eukaryota	Haptophyta	Phaeocystales	Phaeocystaceae	Phaeocystis	Polar	PS103_7	SnoaL
ant_Ga0307397_100338601_LOV_HSFDNAbind_Haptophyta/1-154	Eukaryota	Haptophyta	Phaeocystales	Phaeocystaceae	Phaeocystis	Polar	PS103_7	HSF-DNA-bind
ant_Ga0307397_101402091_LOV_HSFDNAbind_Haptophyta/2-185	Eukaryota	Haptophyta	Phaeocystales	Phaeocystaceae	Phaeocystis	Polar	PS103_7	HSF-DNA-bind
ant_Ga0307398_100348061_LOV_HSFDNAbind_Haptophyta/1-160	Eukaryota	Haptophyta	Phaeocystales	Phaeocystaceae	Phaeocystis	Polar	PS103_11	HSF-DNA-bind
ant_Ga0307398_100756021_LOV_HSFDNAbind_Haptophyta/1-105	Eukaryota	Haptophyta	Phaeocystales	Phaeocystaceae	Phaeocystis	Polar	PS103_11	Homeodomain
ant_Ga0307398_103789731_HomeodomainLOV_Haptophyta/68-200	Eukaryota	Haptophyta	Coccosphaerales	Pontosphaeraceae	Scyphosphaera	Polar	PS103_11	Homeodomain
ant_Ga0307399_100115351_5xLOV_HisKA_Haptophyta/1-148	Eukaryota	Haptophyta	Isochrysidales	Noelaerhabdaceae	Emiliania	Polar	PS103_14	HisKA
ant_Ga0307399_100115351_5xLOV_HisKA_Haptophyta/104-275	Eukaryota	Haptophyta	Isochrysidales	Noelaerhabdaceae	Emiliania	Polar	PS103_14	HisKA
ant_Ga0307399_100115351_5xLOV_HisKA_Haptophyta/230-402	Eukaryota	Haptophyta	Isochrysidales	Noelaerhabdaceae	Emiliania	Polar	PS103_14	HisKA
ant_Ga0307399_100115351_5xLOV_HisKA_Haptophyta/380-529	Eukaryota	Haptophyta	Isochrysidales	Noelaerhabdaceae	Emiliania	Polar	PS103_14	HisKA
ant_Ga0307399_100115351_5xLOV_HisKA_Haptophyta/484-657	Eukaryota	Haptophyta	Isochrysidales	Noelaerhabdaceae	Emiliania	Polar	PS103_14	HisKA
ant_Ga0307399_100239471_LOV_HSFDNAbind_Haptophyta/14-187	Eukaryota	Haptophyta	Phaeocystales	Phaeocystaceae	Phaeocystis	Polar	PS103_14	HSF-DNA-bind
ant_Ga0307399_100285941_LOV_HSFDNAbind_Haptophyta/1-154	Eukaryota	Haptophyta	Phaeocystales	Phaeocystaceae	Phaeocystis	Polar	PS103_14	HSF-DNA-bind
ant_Ga0307399_100319042_Homeodomain_LOV_Haptophyta/200-369	Eukaryota	Haptophyta	Phaeocystales	Phaeocystaceae	Phaeocystis	Polar	PS103_14	Homeodomain
ant_Ga0307399_101523631_LOV_HisKA_Chlorophyta/1-50	Eukaryota	Haptophyta	Nephroselmidales	Nephroselmidaceae	Nephroselmis	Polar	PS103_14	HisKA
ant_Ga0307399_101523631_LOV_HisKA_Chlorophyta/6-177	Eukaryota	Haptophyta	Nephroselmidales	Nephroselmidaceae	Nephroselmis	Polar	PS103_14	HisKA
ant_Ga0307399_111181761_zf-H2C2_5_LOV_Rhodophyta/1-84	Eukaryota	Rhodophyta	Rhodellales	Rhodellaceae	Rhodella	Polar	PS103_14	zf-H2C2
ant_Ga0307399_111181761_zf-H2C2_5_LOV_Rhodophyta/27-110	Eukaryota	Rhodophyta	Rhodellales	Rhodellaceae	Rhodella	Polar	PS103_14	zf-H2C2
ant_Ga0307399_111181761_zf-H2C2_5_LOV_Rhodophyta/52-124	Eukaryota	Rhodophyta	Rhodellales	Rhodellaceae	Rhodella	Polar	PS103_14	zf-H2C2
ant_Ga0307400_100190851_LOV_HisKA_HATPase_C_Responsereg_Chlorophyta/1-152	Eukaryota	Chlorophyta	Mamiellales	Mamiellaceae	Mantoniella	Polar	PS103_17	HisKA-HATPase-Responsereg
ant_Ga0307400_100657891_LOV_HSF_DNAbind_Haptophyta/1-160	Eukaryota	Haptophyta	Phaeocystales	Phaeocystaceae	Phaeocystis	Polar	PS103_17	HSF-DNA-bind
ant_Ga0307400_100736621_2xLOV_HisKA_HATPase_c_Responsereg_Haptophyta/1-88	Eukaryota	Haptophyta	Phaeocystales	Phaeocystaceae	Phaeocystis	Polar	PS103_17	HisKA-HATPase-Responsereg
ant_Ga0307400_100736621_2xLOV_HisKA_HATPase_c_Responsereg_Haptophyta/43-216	Eukaryota	Haptophyta	Phaeocystales	Phaeocystaceae	Phaeocystis	Polar	PS103_17	HisKA-HATPase-Responsereg
ant_Ga0307400_101886691_DUF1275_EF_hand_LOV_Detonula/281-427	Eukaryota	Bacillariophyta	Thalassiosirales	Thalassiosiraceae	Detonula	Polar	PS103_17	EF-hand
ant_Ga0307400_102238011_LOV_HSF_DNAbind_Haptophyta/1-154	Eukaryota	Haptophyta	Phaeocystales	Phaeocystaceae	Phaeocystis	Polar	PS103_17	HSF-DNA-bind
ant_Ga0307400_103027371_LOV_Pkinase_Chlorophyta/1-152	Eukaryota	Chlorophyta	Pyramimonadales	Pyramimonadaceae	Pyramimonas	Polar	PS103_17	Pkinase
ant_Ga0307401_100997181_LOV_HSF_DNAbind_Haptophyta/1-154	Eukaryota	Haptophyta	Phaeocystales	Phaeocystaceae	Phaeocystis	Polar	PS103_23	HSF-DNA-bind
ant_Ga0307401_101189732_WRKY_LOV_Chlorophyta/202-298	Eukaryota	Chlorophyta	Prasinococcales	Prasinococcaceae	Prasinococcus	Polar	PS103_23	WRKY
ant_Ga0307402_101219281_LOV_HSF_DNAbind_Haptophyta/1-169	Eukaryota	Haptophyta	Phaeocystales	Phaeocystaceae	Phaeocystis	Polar	PS103_29	HSF-DNA-bind
ant_Ga0307402_101599421_3xLOV_HisKA_Fragilariopsis/1-84	Eukaryota	Bacillariophyta	Bacillariales	Bacillariaceae	Fragilariopsis	Polar	PS103_29	HisKA
ant_Ga0307402_101599421_3xLOV_HisKA_Fragilariopsis/170-339	Eukaryota	Bacillariophyta	Bacillariales	Bacillariaceae	Fragilariopsis	Polar	PS103_29	HisKA
ant_Ga0307402_101599421_3xLOV_HisKA_Fragilariopsis/38-212	Eukaryota	Bacillariophyta	Bacillariales	Bacillariaceae	Fragilariopsis	Polar	PS103_29	HisKA
arc_Ga0063085_11338321_LOV_HSF_DNAbind_Haptophyta/1-99	Eukaryota	Haptophyta	Phaeocystales	Phaeocystaceae	Phaeocystis	Polar	ARK_1	HSF-DNA-bind
arc_Ga0063087_10199401_LOV_HSFDNAbind_Haptophyta/4-179	Eukaryota	Haptophyta	Phaeocystales	Phaeocystaceae	Phaeocystis	Polar	ARK_2	HSF-DNA-bind
arc_Ga0063087_10477911_LOV_HSFDNAbind_Haptophyta/1-163	Eukaryota	Haptophyta	Phaeocystales	Phaeocystaceae	Phaeocystis	Polar	ARK_2	HSF-DNA-bind
arc_Ga0063091_10002871_LOV_HSF_DNAbind_Haptophyta/1-166	Eukaryota	Haptophyta	Phaeocystales	Phaeocystaceae	Phaeocystis	Polar	ARK_8M	HSF-DNA-bind
arc_Ga0063091_10075761_LOV_HSF_DNAbind_Haptophyta/1-161	Eukaryota	Haptophyta	Phaeocystales	Phaeocystaceae	Phaeocystis	Polar	ARK_8M	HSF-DNA-bind
arc_Ga0063091_10355211_Homeodomain_LOV_Haptophyta/225-397	Eukaryota	Haptophyta	Phaeocystales	Phaeocystaceae	Phaeocystis	Polar	ARK_8M	Homeodomain
arc_Ga0063096_10054071_LOV_HSF_DNAbind_Haptophyta/10-184	Eukaryota	Haptophyta	Phaeocystales	Phaeocystaceae	Phaeocystis	Polar	ARK_51M	HSF-DNA-bind
arc_Ga0063096_10378781_LOV_HSF_DNAbind_Haptophyta/1-164	Eukaryota	Haptophyta	Phaeocystales	Phaeocystaceae	Phaeocystis	Polar	ARK_51M	HSF-DNA-bind
arc_Ga0063096_10408761_LOV_HSF_DNAbind_Haptophyta/1-160	Eukaryota	Haptophyta	Phaeocystales	Phaeocystaceae	Phaeocystis	Polar	ARK_51M	HSF-DNA-bind
arc_Ga0063098_10008431_LOV_HSF_DNAbind_Haptophyta/1-167	Eukaryota	Haptophyta	Phaeocystales	Phaeocystaceae	Phaeocystis	Polar	ARK_61M	HSF-DNA-bind
arc_Ga0063098_10348451_LOV_HSF_DNAbind_Haptophyta/1-159	Eukaryota	Haptophyta	Phaeocystales	Phaeocystaceae	Phaeocystis	Polar	ARK_61M	HSF-DNA-bind
arc_Ga0063100_10021021_LOV_HSF_DNAbind_Haptophyta/11-185	Eukaryota	Haptophyta	Phaeocystales	Phaeocystaceae	Phaeocystis	Polar	ARK_87M	HSF-DNA-bind
arc_Ga0063100_10248481_4xLOV_HisKA_HATPaseC_Responsereg_Hpt_Haptophyta/140-314	Eukaryota	Haptophyta	Phaeocystales	Phaeocystaceae	Phaeocystis	Polar	ARK_87M	HisKA-HATPase-Responsereg
arc_Ga0063100_10248481_4xLOV_HisKA_HATPaseC_Responsereg_Hpt_Haptophyta/16-187	Eukaryota	Haptophyta	Phaeocystales	Phaeocystaceae	Phaeocystis	Polar	ARK_87M	HisKA-HATPase-Responsereg
arc_Ga0063100_10248481_4xLOV_HisKA_HATPaseC_Responsereg_Hpt_Haptophyta/292-441	Eukaryota	Haptophyta	Phaeocystales	Phaeocystaceae	Phaeocystis	Polar	ARK_87M	HisKA-HATPase-Responsereg
arc_Ga0063100_10248481_4xLOV_HisKA_HATPaseC_Responsereg_Hpt_Haptophyta/396-569	Eukaryota	Haptophyta	Phaeocystales	Phaeocystaceae	Phaeocystis	Polar	ARK_87M	HisKA-HATPase-Responsereg
arc_Ga0063101_10345621_DUF1275_EFhand_LOV_Detonula/298-457	Eukaryota	Bacillariophyta	Thalassiosirales	Thalassiosiraceae	Detonula	Polar	ARK_118M	EF-hand
arc_Ga0063102_10588041_EFhand_LOV_Detonula/161-320	Eukaryota	Bacillariophyta	Thalassiosirales	Thalassiosiraceae	Detonula	Polar	ARK_120M	EF-hand
arc_Ga0063755_10130801_LOV_HSF_DNAbind_Haptophyta/1-167	Eukaryota	Haptophyta	Phaeocystales	Phaeocystaceae	Phaeocystis	Polar	ARK_5M	HSF-DNA-bind
arc_Ga0063755_10249301_LOV_HSFDNAbind_Haptophyta/1-164	Eukaryota	Haptophyta	Coccolithales	Calcidiscaceae	Calcidiscus	Polar	ARK_5M	HSF-DNA-bind
arc_Ga0063755_10576871_Homeodomain_LOV_Haptophyta/181-348	Eukaryota	Haptophyta	Coccolithales	Calcidiscaceae	Calcidiscus	Polar	ARK_5M	Homeodomain
arc_Ga0063755_10588861_LOV_HSFDNAbind_Haptophyta/1-161	Eukaryota	Haptophyta	Phaeocystales	Phaeocystaceae	Phaeocystis	Polar	ARK_5M	HSF-DNA-bind
arc_Ga0063756_10009231_LOV_LRR5_Haptophyta/10-170	Eukaryota	Haptophyta	Coccolithales	Calcidiscaceae	Calcidiscus	Polar	ARK_7M	LRR5
arc_Ga0063756_10477961_LOV_PKinase_Chlorophyta/1-134	Eukaryota	Chlorophyta	Mamiellales	Mamiellaceae	Mantoniella	Polar	ARK_7M	Pkinase
arc_Ga0063756_10517941_LOV_HSF_DNAbind_Haptophyta/1-160	Eukaryota	Haptophyta	Phaeocystales	Phaeocystaceae	Phaeocystis	Polar	ARK_7M	HSF-DNA-bind
arc_Ga0063756_10587551_Homeodomain_LOV_Haptophyta/182-349	Eukaryota	Haptophyta	Coccolithales	Calcidiscaceae	Calcidiscus	Polar	ARK_7M	Homeodomain
arc_Ga0063756_11254691_LOV_WRKY_Chlorophyta/1-76	Eukaryota	Chlorophyta	Picocystales	Picocystaceae	Picocystis	Polar	ARK_7M	WRKY
Phatr3_AUREO1a_Aureo1a/210-378	Eukaryota	Bacillariophyta	Naviculales	Phaeodactylaceae	Phaeodactylum	Temperate	-	PtAureo1a
Phatr3_AUREO1b_Aureo1b/277-447	Eukaryota	Bacillariophyta	Naviculales	Phaeodactylaceae	Phaeodactylum	Temperate	-	PtAureo1b
Phatr3_AUREO1c_Aureo1c/154-327	Eukaryota	Bacillariophyta	Naviculales	Phaeodactylaceae	Phaeodactylum	Temperate	-	PtAureo1c
Phatr3_AUREO2_Aureo2/257-432	Eukaryota	Bacillariophyta	Naviculales	Phaeodactylaceae	Phaeodactylum	Temperate	-	PtAureo2
temp_Ga0063126_10288631_LOV_HisKA_Chlorophyta/1-152	Eukaryota	Chlorophyta	Mamiellales	Bathycoccaceae	Ostreococcus	Temperate	S0_C1	HisKA
temp_Ga0063131_10361601_LOV_HisKA_HATPaseC_Response_reg_Chlorophyta/42-219	Eukaryota	Chlorophyta	Mamiellales	Bathycoccaceae	Ostreococcus	Temperate	S5_C1	HisKA-HATPase-Responsereg
temp_Ga0063131_10895271_LOV_HisKA_LOV_HATPaseC_Chlorophyta/1-67	Eukaryota	Chlorophyta	Mamiellales	Bathycoccaceae	Bathycoccus	Temperate	S5_C1	HisKA-HATPase
temp_Ga0063131_10895271_LOV_HisKA_LOV_HATPaseC_Chlorophyta/221-319	Eukaryota	Chlorophyta	Mamiellales	Bathycoccaceae	Bathycoccus	Temperate	S5_C1	HisKA-HATPase
temp_Ga0063133_10203241_LOV_HisKA_HATPaseC_Response_reg_Chlorophyta/30-207	Eukaryota	Chlorophyta	Mamiellales	Bathycoccaceae	Ostreococcus	Temperate	S7_C1	HisKA-HATPase-Responsereg
temp_Ga0063133_10615861_2xLOV_PKinase_Chlorophyta/1-77	Eukaryota	Chlorophyta	Mamiellales	Bathycoccaceae	Ostreococcus	Temperate	S7_C1	Pkinase	Phototropin_LOV1
temp_Ga0063133_10615861_2xLOV_PKinase_Chlorophyta/83-259	Eukaryota	Chlorophyta	Mamiellales	Bathycoccaceae	Ostreococcus	Temperate	S7_C1	Pkinase	Phototropin_LOV2
temp_Ga0063133_10739951_LOV_HISKa_HATPaseC_Prasinodermophyta/1-78	Eukaryota	Prasinodermophyta	Prasinodermales	Prasinodermaceae	Prasinoderma	Temperate	S7_C1	HisKA-HATPase
temp_Ga0063134_10515001_LOV_HisKA_Prasinodermophyta/1-141	Eukaryota	Prasinodermophyta	Prasinodermales	Prasinodermaceae	Prasinoderma	Temperate	S9_C1	HisKA
temp_Ga0063134_10944351_LOV_HisKA_Chlorophyta/25-202	Eukaryota	Chlorophyta	Mamiellales	Bathycoccaceae	Ostreococcus	Temperate	S9_C1	HisKA
temp_Ga0063135_10139421_LOV_HisKA_HATPaseC_Response_reg_Chlorophyta/23-200	Eukaryota	Chlorophyta	Mamiellales	Bathycoccaceae	Ostreococcus	Temperate	S11_C1	HisKA-HATPase-Responsereg
temp_Ga0063135_10501301_LOV_PKinase_Chlorophyta/1-164	Eukaryota	Chlorophyta	Mamiellales	Bathycoccaceae	Ostreococcus	Temperate	S11_C1	Pkinase
temp_Ga0063136_10059201_LOV_HisKA_HATPaseC_Response_reg_Chlorophyta/34-211	Eukaryota	Chlorophyta	Mamiellales	Bathycoccaceae	Ostreococcus	Temperate	S13_C1	HisKA-HATPase-Responsereg
temp_Ga0063136_10128521_2xLOV_PKinase_PK_Tyr_Ser_Thr_Chlorophyta/1-101	Eukaryota	Chlorophyta	Mamiellales	Bathycoccaceae	Ostreococcus	Temperate	S13_C1	Pkinase-PK-Tyr-Ser-Thr	Phototropin_LOV1
temp_Ga0063136_10128521_2xLOV_PKinase_PK_Tyr_Ser_Thr_Chlorophyta/107-283	Eukaryota	Chlorophyta	Mamiellales	Bathycoccaceae	Ostreococcus	Temperate	S13_C1	Pkinase-PK-Tyr-Ser-Thr	Phototropin_LOV2
temp_Ga0063137_10069171_LOV_HisKA_HATPaseC_Response_reg_Chlorophyta/23-200	Eukaryota	Chlorophyta	Mamiellales	Bathycoccaceae	Ostreococcus	Temperate	S15_C1	HisKA-HATPase-Responsereg
temp_Ga0063137_10241241_2xLOV_PKinase_PK_Tyr_Ser_Thr_Chlorophyta/1-95	Eukaryota	Chlorophyta	Mamiellales	Bathycoccaceae	Ostreococcus	Temperate	S15_C1	HisKA-HATPase-Responsereg	Phototropin_LOV1
temp_Ga0063137_10241241_2xLOV_PKinase_PK_Tyr_Ser_Thr_Chlorophyta/101-277	Eukaryota	Chlorophyta	Mamiellales	Bathycoccaceae	Ostreococcus	Temperate	S15_C1	Pkinase	Phototropin_LOV2
temp_Ga0063137_10540311_Homeodomain_LOV_Haptophyta/94-235	Eukaryota	Haptophyta	Prymnesiales	Prymnesiaceae	Prymnesium	Temperate	S15_C1	Homeodomain
temp_Ga0063138_10135841_LOV_HisKA_HATPaseC_Response_reg_Chlorophyta/53-230	Eukaryota	Chlorophyta	Mamiellales	Bathycoccaceae	Ostreococcus	Temperate	S17_C1	HisKA-HATPase-Responsereg
temp_Ga0063138_10380871_Homeodomain_LOV_Haptophyta/94-258	Eukaryota	Haptophyta	Prymnesiales	Prymnesiaceae	Prymnesium	Temperate	S17_C1	Homeodomain
temp_Ga0063138_10461391_Homeodomain_LOV_Haptophyta/101-252	Eukaryota	Haptophyta	Prymnesiales	Prymnesiaceae	Prymnesium	Temperate	S17_C1	Homeodomain
temp_Ga0063138_10700101_LOV_HisKA_Chlorophyta/1-123	Eukaryota	Chlorophyta	Mamiellales	Mamiellaceae	Mantoniella	Temperate	S17_C1	HisKA
temp_Ga0063138_10766141_LOV_PKinase_PK_Tyr_Ser_Thr_Chlorophyta/1-153	Eukaryota	Chlorophyta	Mamiellales	Bathycoccaceae	Ostreococcus	Temperate	S17_C1	Pkinase-PK-Tyr-Ser-Thr
temp_Ga0063138_11215461_Homeodomain_LOV_Haptophyta/79-220	Eukaryota	Haptophyta	Prymnesiales	Prymnesiaceae	Prymnesium	Temperate	S17_C1	Homeodomain
temp_Ga0063138_11495051_Homeodomain_LOV_Haptophyta/70-170	Eukaryota	Haptophyta	Prymnesiales	Prymnesiaceae	Prymnesium	Temperate	S17_C1	Homeodomain
temp_Ga0063144_10120181_2xLOV_PKinase_Chlorophyta/1-137	Eukaryota	Chlorophyta	Mamiellales	Mamiellaceae	Mantoniella	Temperate	S27_C1	Pkinase	Phototropin_LOV1
temp_Ga0063144_10120181_2xLOV_PKinase_Chlorophyta/145-320	Eukaryota	Chlorophyta	Mamiellales	Mamiellaceae	Mantoniella	Temperate	S27_C1	Pkinase	Phototropin_LOV2
temp_Ga0063144_10268391_LOV_HisKA_HATPaseC_Chlorophyta/30-206	Eukaryota	Chlorophyta	Mamiellales	Mamiellaceae	Mantoniella	Temperate	S27_C1	HisKA-HATPase
temp_Ga0063145_10186051_3xLOV_HisKA_HATPaseC_Response_reg_PseudoNitzschia/358-449	Eukaryota	Bacillariophyta	Bacillariales	Bacillariaceae	Pseudo-nitzschia	Temperate	S29_C1	HisKA-HATPase-Responsereg
temp_Ga0063145_10186051_3xLOV_HisKA_HATPaseC_Response_reg_PseudoNitzschia/525-697	Eukaryota	Bacillariophyta	Bacillariales	Bacillariaceae	Pseudo-nitzschia	Temperate	S29_C1	HisKA-HATPase-Responsereg
temp_Ga0063145_10186051_3xLOV_HisKA_HATPaseC_Response_reg_PseudoNitzschia/656-824	Eukaryota	Bacillariophyta	Bacillariales	Bacillariaceae	Pseudo-nitzschia	Temperate	S29_C1	HisKA-HATPase-Responsereg
temp_Ga0063145_10330571_LOV_HisKA_HATPaseC_Chlorophyta/1-176	Eukaryota	Chlorophyta	Mamiellales	Mamiellaceae	Mantoniella	Temperate	S29_C1	HisKA-HATPase
temp_Ga0063872_10211811_LOV_HSF_DNAbind_Haptophyta/1-164	Eukaryota	Haptophyta	Phaeocystales	Phaeocystaceae	Phaeocystis	Temperate	ANT_15	HSF-DNA-bind
temp_Ga0307381_100131831_LOV_HSF_DNAbind_Haptophyta/1-170	Eukaryota	Haptophyta	Phaeocystales	Phaeocystaceae	Phaeocystis	Temperate	PS103_1_R1	HSF-DNA-bind
temp_Ga0307381_100242301_2xLOV_HisKA_HATPaseC_Haptophyta/109-282	Eukaryota	Haptophyta	Phaeocystales	Phaeocystaceae	Phaeocystis	Temperate	PS103_1_R1	HisKA-HATPase
temp_Ga0307381_100242301_2xLOV_HisKA_HATPaseC_Haptophyta/4-154	Eukaryota	Haptophyta	Phaeocystales	Phaeocystaceae	Phaeocystis	Temperate	PS103_1_R1	HisKA-HATPase
temp_Ga0307381_100323771_2xLOV_HisKA_HATPaseC_Prasinodermophyta/1-115	Eukaryota	Prasinodermophyta	Prasinodermales	Prasinodermaceae	Prasinoderma	Temperate	PS103_1_R1	HisKA-HATPase
temp_Ga0307381_100323771_2xLOV_HisKA_HATPaseC_Prasinodermophyta/75-210	Eukaryota	Prasinodermophyta	Prasinodermales	Prasinodermaceae	Prasinoderma	Temperate	PS103_1_R1	HisKA-HATPase
temp_Ga0307381_100677281_LOV_HSF_DNAbind_Haptophyta/1-97	Eukaryota	Haptophyta	Phaeocystales	Phaeocystaceae	Phaeocystis	Temperate	PS103_1_R1	HSF-DNA-bind
temp_Ga0307381_101013051_LOV_Fbox_like_Chlorophyta/24-210	Eukaryota	Chlorophyta	Dolichomastigales	Dolichomastigaceae	Dolichomastix	Temperate	PS103_1_R1	Fbox_like
temp_Ga0307384_100234701_LOV_HSF_DNAbind_Haptophyta/7-180	Eukaryota	Haptophyta	Phaeocystales	Phaeocystaceae	Phaeocystis	Temperate	PS103_2_R1	HSF-DNA-bind
temp_Ga0307384_100634661_LOV_HSF_DNAbind_Haptophyta/1-169	Eukaryota	Haptophyta	Phaeocystales	Phaeocystaceae	Phaeocystis	Temperate	PS103_2_R1	HSF-DNA-bind
temp_Ga0307387_100415401_LOV_Ion_trans_Chlorophyta/1-164	Eukaryota	Chlorophyta	Dolichomastigales	Dolichomastigaceae	Dolichomastix	Temperate	PS103_3_R1	Ion_trans
temp_Ga0307387_100569061_LOV_HSF_DNAbind_Haptophyta/9-183	Eukaryota	Haptophyta	Phaeocystales	Phaeocystaceae	Phaeocystis	Temperate	PS103_3_R1	HSF-DNA-bind
temp_Ga0307387_100747651_2xLOV_HisKA_HATPaseC_Thalassiosira/1-117	Eukaryota	Bacillariophyta	Thalassiosirales	Thalassiosiraceae	Thalassiosira	Temperate	PS103_3_R1	HisKA-HATPase
temp_Ga0307387_100747651_2xLOV_HisKA_HATPaseC_Thalassiosira/188-356	Eukaryota	Bacillariophyta	Thalassiosirales	Thalassiosiraceae	Thalassiosira	Temperate	PS103_3_R1	HisKA-HATPase
temp_Ga0307387_100747651_2xLOV_HisKA_HATPaseC_Thalassiosira/65-236	Eukaryota	Bacillariophyta	Thalassiosirales	Thalassiosiraceae	Thalassiosira	Temperate	PS103_3_R1	HisKA-HATPase
temp_Ga0307387_101713341_LOV_HSF_DNAbind_Haptophyta/1-110	Eukaryota	Haptophyta	Phaeocystales	Phaeocystaceae	Phaeocystis	Temperate	PS103_3_R1	HSF-DNA-bind
temp_Ga0307387_104852751_LOV_WRKY_Haptophyta/1-147	Eukaryota	Haptophyta	Coccolithales	Calcidiscaceae	Calcidiscus	Temperate	PS103_3_R1	WRKY
