# Supplementary material
Source: Research Square preprint supplement (doi:10.21203/rs.3.rs-9010570/v1)
Supplement: Supplementary file 2 [file e531598a50cc9799cd29425b.xlsx]

## Sheet: Sheet1
Sequence_Name	TAX_LIN_1	TAX_LIN_2	TAX_LIN_3	TAX_LIN_4	TAX_LIN_5	Location	Aureochrome_Isoform	Sequence Origin	Data Source	EukProt ID
_Heterosigma_akashiwo_P006823	Ochrophyta	Raphidophyceae	Heterosigma	Heterosigma akashiwo	Photosynthetic Stramenopile	Non-polar	Aureochrome 1c	EukProt	Transcriptome	EP00639
Cafeteria_burkhardae_Aureo	Bicosoecida	Opalozoa	Cafeteria	Cafeteria burkhardae	Non-Photosynthetic Stramenopile	Non-polar	Aureochrome 2	EukProt	Genome	EP00749
Ectocarpus_siliculosus_P000431_Aureochrome1	Ochrophyta	Phaeophyceae	Ectocarpus	Ectocarpus siliculosus	Photosynthetic Stramenopile	Non-polar	Aureochrome 1a	EukProt	Genome	EP00609
Ectocarpus_siliculosus_P005424_Aureochrome4	Ochrophyta	Phaeophyceae	Ectocarpus	Ectocarpus siliculosus	Photosynthetic Stramenopile	Non-polar	Aureochrome 1c	EukProt	Genome	EP00609
Ectocarpus_siliculosus_P010128_Aureochrome2	Ochrophyta	Phaeophyceae	Ectocarpus	Ectocarpus siliculosus	Photosynthetic Stramenopile	Non-polar	Aureochrome 2	EukProt	Genome	EP00609
Ectocarpus_siliculosus_P013731_Aureochrome3	Ochrophyta	Phaeophyceae	Ectocarpus	Ectocarpus siliculosus	Photosynthetic Stramenopile	Non-polar	Aureochrome 1a	EukProt	Genome	EP00609
Halocafeteria_seosinensis_AureoX	Bicosoecida	Opalozoa	Halocafeteria	Halocafeteria seosinensis	Non-Photosynthetic Stramenopile	Non-polar	Aureochrome 2	EukProt	Transcriptome	EP01138
Halocafeteria_seosinensis_AureoY	Bicosoecida	Opalozoa	Halocafeteria	Halocafeteria seosinensis	Non-Photosynthetic Stramenopile	Non-polar	Aureochrome 2	EukProt	Transcriptome	EP01138
Heterosigma_akashiwo_P005828	Ochrophyta	Raphidophyceae	Heterosigma	Heterosigma akashiwo	Photosynthetic Stramenopile	Non-polar	Aureochrome 1a	EukProt	Transcriptome	EP00639
Heterosigma_akashiwo_P036959	Ochrophyta	Raphidophyceae	Heterosigma	Heterosigma akashiwo	Photosynthetic Stramenopile	Non-polar	Aureochrome 2	EukProt	Transcriptome	EP00639
Incisomonas_marina_AureoX	Bicosoecida	Opalozoa	Incisomonas	Incisomonas marina	Non-Photosynthetic Stramenopile	Non-polar	Aureochrome 2	EukProt	Transcriptome	EP00750
Incisomonas_marina_AureoY	Bicosoecida	Opalozoa	Incisomonas	Incisomonas marina	Non-Photosynthetic Stramenopile	Non-polar	Aureochrome 2	EukProt	Transcriptome	EP00750
Nannochloropsis_granulata_P004981	Ochrophyta	Eustigmatophyceae	Nannochloropsis	Nannochloropsis granulata	Photosynthetic Stramenopile	Non-polar	Aureochrome 1c	EukProt	Genome	EP00624
p_Chaetoceros_debilis_1_Aureo2	Ochrophyta	Coscinodiscophycidae	Chaetoceros	Chaetoceros debilis	Photosynthetic Stramenopile	Polar	Aureochrome 2	doi:10.1111/ppl.12539	Transcriptome	-
p_Chaetoceros_debilis_2_Aureo1a	Ochrophyta	Coscinodiscophycidae	Chaetoceros	Chaetoceros debilis	Photosynthetic Stramenopile	Polar	Aureochrome 1a	doi:10.1111/ppl.12540	Transcriptome	-
p_Chaetoceros_debilis_3_Aureo1b	Ochrophyta	Coscinodiscophycidae	Chaetoceros	Chaetoceros debilis	Photosynthetic Stramenopile	Polar	Aureochrome 1b	doi:10.1111/ppl.12541	Transcriptome	-
p_Chaetoceros_neogracilis_1_Aureo1a	Ochrophyta	Coscinodiscophycidae	Chaetoceros	Chaetoceros neogracilis	Photosynthetic Stramenopile	Polar	Aureochrome 1a	EukProt	Genome	EP00979
p_Chaetoceros_neogracilis_2_Aureo1c	Ochrophyta	Coscinodiscophycidae	Chaetoceros	Chaetoceros neogracilis	Photosynthetic Stramenopile	Polar	Aureochrome 1c	EukProt	Genome	EP00979
p_Chaetoceros_neogralis_1_Aureo2	Ochrophyta	Coscinodiscophycidae	Chaetoceros	Chaetoceros neogracilis	Photosynthetic Stramenopile	Polar	Aureochrome 2	EukProt	Genome	EP00979
p_Chaetoceros_sp_1_Aureo2	Ochrophyta	Coscinodiscophycidae	Chaetoceros	Chaetoceros sp	Photosynthetic Stramenopile	Polar	Aureochrome 2	Selfmade	Transcriptome	-
p_Chaetoceros_sp_2_Aureo1c	Ochrophyta	Coscinodiscophycidae	Chaetoceros	Chaetoceros sp	Photosynthetic Stramenopile	Polar	Aureochrome 1c	Selfmade	Transcriptome	-
p_Chaetoceros_sp_3_Aureo1a	Ochrophyta	Coscinodiscophycidae	Chaetoceros	Chaetoceros sp	Photosynthetic Stramenopile	Polar	Aureochrome 1a	Selfmade	Transcriptome	-
p_Eucampia_antarctica_1_Aureo2	Ochrophyta	Coscinodiscophycidae	Eucampia	Eucampia anarctica	Photosynthetic Stramenopile	Polar	Aureochrome 2	EukProt	Transcriptome	EP00560
p_Eucampia_antarctica_2_Aureo1c	Ochrophyta	Coscinodiscophycidae	Eucampia	Eucampia anarctica	Photosynthetic Stramenopile	Polar	Aureochrome 1c	EukProt	Transcriptome	EP00560
p_Eucampia_antarctica_3_Aureo1b	Ochrophyta	Coscinodiscophycidae	Eucampia	Eucampia anarctica	Photosynthetic Stramenopile	Polar	Aureochrome 1b	EukProt	Transcriptome	EP00560
p_Eucampia_antarctica_4_Aureo1a	Ochrophyta	Coscinodiscophycidae	Eucampia	Eucampia anarctica	Photosynthetic Stramenopile	Polar	Aureochrome 1a	EukProt	Transcriptome	EP00560
p_Fragilariopsis_cylindrus_1_Aureo2	Ochrophyta	Bacillariophycidae	Fragilariopsis	Fragilariopsis cylindus	Photosynthetic Stramenopile	Polar	Aureochrome 2	EukProt	Genome	EP00528
p_Fragilariopsis_cylindrus_2_Aureo1b	Ochrophyta	Bacillariophycidae	Fragilariopsis	Fragilariopsis cylindus	Photosynthetic Stramenopile	Polar	Aureochrome 1b	EukProt	Genome	EP00528
p_Fragilariopsis_cylindrus_3_Aureo1a	Ochrophyta	Bacillariophycidae	Fragilariopsis	Fragilariopsis cylindus	Photosynthetic Stramenopile	Polar	Aureochrome 1a	EukProt	Genome	EP00528
p_Fragilariopsis_kergulensis_1_Aureo2	Ochrophyta	Bacillariophycidae	Fragilariopsis	Fragilariopsis kerguelensis	Photosynthetic Stramenopile	Polar	Aureochrome 2	doi:10.1111/ppl.12541	Transcriptome	-
p_Fragilariopsis_kergulensis_2_Aureo1b	Ochrophyta	Bacillariophycidae	Fragilariopsis	Fragilariopsis kerguelensis	Photosynthetic Stramenopile	Polar	Aureochrome 1b	doi:10.1111/ppl.12541	Transcriptome	-
p_Fragilariopsis_kergulensis_3_Aureo1a	Ochrophyta	Bacillariophycidae	Fragilariopsis	Fragilariopsis kerguelensis	Photosynthetic Stramenopile	Polar	Aureochrome 1a	doi:10.1111/ppl.12541	Transcriptome	-
p_Fragilariopsis_nana_2_Aureo2	Ochrophyta	Bacillariophycidae	Fragilariopsis	Fragilariopsis nana	Photosynthetic Stramenopile	Polar	Aureochrome 2	Selfmade	Transcriptome	-
p_Fragilariopsis_nana_5_Aureo1b	Ochrophyta	Bacillariophycidae	Fragilariopsis	Fragilariopsis nana	Photosynthetic Stramenopile	Polar	Aureochrome 1b	Selfmade	Transcriptome	-
p_Fragilariopsis_nana_6_Aureo1a	Ochrophyta	Bacillariophycidae	Fragilariopsis	Fragilariopsis nana	Photosynthetic Stramenopile	Polar	Aureochrome 1a	Selfmade	Transcriptome	-
p_minidiscus_sp_6_Aureo1c	Ochrophyta	Coscinodiscophycidae	Minidiscus	Minidiscus sp	Photosynthetic Stramenopile	Polar	Aureochrome 1c	10.5281/zenodo.4591036	Transcriptome	-
p_minidiscus_spp_12_Aureo1a	Ochrophyta	Coscinodiscophycidae	Minidiscus	Minidiscus spp	Photosynthetic Stramenopile	Polar	Aureochrome 1a	10.5281/zenodo.4591037	Transcriptome	-
p_minidiscus_spp_2_Aureo2	Ochrophyta	Coscinodiscophycidae	Minidiscus	Minidiscus spp	Photosynthetic Stramenopile	Polar	Aureochrome 2	10.5281/zenodo.4591038	Transcriptome	-
p_minidiscus_spp_3_Aureo2	Ochrophyta	Coscinodiscophycidae	Minidiscus	Minidiscus spp	Photosynthetic Stramenopile	Polar	Aureochrome 2	10.5281/zenodo.4591039	Transcriptome	-
p_minidiscus_spp_9_Aureo1b	Ochrophyta	Coscinodiscophycidae	Minidiscus	Minidiscus spp	Photosynthetic Stramenopile	Polar	Aureochrome 1b	10.5281/zenodo.4591040	Transcriptome	-
p_Odontella_sp_4_Aureo1b	Ochrophyta	Coscinodiscophycidae	Odontella	Odontella sp	Photosynthetic Stramenopile	Polar	Aureochrome 1b	Selfmade	Transcriptome	-
p_pseudo-nitzschia_sp_13_Aureo1a	Ochrophyta	Bacillariophycidae	Pseudo-Nitzschia	Pseudo_Nitzschia sp	Photosynthetic Stramenopile	Polar	Aureochrome 1a	Selfmade	Transcriptome	-
p_pseudo-nitzschia_sp_2_Aureo2	Ochrophyta	Bacillariophycidae	Pseudo-Nitzschia	Pseudo_Nitzschia sp	Photosynthetic Stramenopile	Polar	Aureochrome 2	Selfmade	Transcriptome	-
p_pseudo-nitzschia_sp_4_Aureo1c	Ochrophyta	Bacillariophycidae	Pseudo-Nitzschia	Pseudo_Nitzschia sp	Photosynthetic Stramenopile	Polar	Aureochrome 1c	Selfmade	Transcriptome	-
p_pseudo-nitzschia_sp_5_Aureo1c	Ochrophyta	Bacillariophycidae	Pseudo-Nitzschia	Pseudo_Nitzschia sp	Photosynthetic Stramenopile	Polar	Aureochrome 1c	Selfmade	Transcriptome	-
p_pseudo-nitzschia_sp_7_Aureo1b	Ochrophyta	Bacillariophycidae	Pseudo-Nitzschia	Pseudo_Nitzschia sp	Photosynthetic Stramenopile	Polar	Aureochrome 1b	Selfmade	Transcriptome	-
p_Synedropsis_sp_1_Aureo2	Ochrophyta	Fragilariophycidae	Synedropsis	Synedropsis sp	Photosynthetic Stramenopile	Polar	Aureochrome 2	EukProt	Transcriptome	EP00545
p_Synedropsis_sp_2_Aureo1c	Ochrophyta	Fragilariophycidae	Synedropsis	Synedropsis sp	Photosynthetic Stramenopile	Polar	Aureochrome 1c	EukProt	Transcriptome	EP00545
p_Synedropsis_sp_3_Aureo1a	Ochrophyta	Fragilariophycidae	Synedropsis	Synedropsis sp	Photosynthetic Stramenopile	Polar	Aureochrome 1a	EukProt	Transcriptome	EP00545
p_thalassiosira_minima_1_Aureo2	Ochrophyta	Coscinodiscophycidae	Thalassiosira	Thalassiosira minima	Photosynthetic Stramenopile	Polar	Aureochrome 2	10.5281/zenodo.4591036	Transcriptome	-
p_thalassiosira_minima_14_Aureo1b	Ochrophyta	Coscinodiscophycidae	Thalassiosira	Thalassiosira minima	Photosynthetic Stramenopile	Polar	Aureochrome 1b	10.5281/zenodo.4591037	Transcriptome	-
p_thalassiosira_minima_16_Aureo1a	Ochrophyta	Coscinodiscophycidae	Thalassiosira	Thalassiosira minima	Photosynthetic Stramenopile	Polar	Aureochrome 1a	10.5281/zenodo.4591038	Transcriptome	-
p_thalassiosira_minima_4_Aureo2	Ochrophyta	Coscinodiscophycidae	Thalassiosira	Thalassiosira minima	Photosynthetic Stramenopile	Polar	Aureochrome 2	10.5281/zenodo.4591039	Transcriptome	-
p_thalassiosira_minima_7_Aureo1c	Ochrophyta	Coscinodiscophycidae	Thalassiosira	Thalassiosira minima	Photosynthetic Stramenopile	Polar	Aureochrome 1c	10.5281/zenodo.4591040	Transcriptome	-
p_Thalassiosira_sp_1_Aureo1c	Ochrophyta	Coscinodiscophycidae	Thalassiosira	Thalassiosira sp	Photosynthetic Stramenopile	Polar	Aureochrome 1c	Selfmade	Transcriptome	-
p_thalassiosira_sp_4_Aureo1b	Ochrophyta	Coscinodiscophycidae	Thalassiosira	Thalassiosira sp	Photosynthetic Stramenopile	Polar	Aureochrome 1b	Selfmade	Transcriptome	-
p_thalassiosira_spp_10_Aureo1b	Ochrophyta	Coscinodiscophycidae	Thalassiosira	Thalassiosira spp	Photosynthetic Stramenopile	Polar	Aureochrome 1b	10.5281/zenodo.4591040	Transcriptome	-
p_thalassiosira_spp_3_Aureo2	Ochrophyta	Coscinodiscophycidae	Thalassiosira	Thalassiosira spp	Photosynthetic Stramenopile	Polar	Aureochrome 2	10.5281/zenodo.4591041	Transcriptome	-
p_thalassiosira_spp_4_Aureo1a	Ochrophyta	Coscinodiscophycidae	Thalassiosira	Thalassiosira spp	Photosynthetic Stramenopile	Polar	Aureochrome 1a	10.5281/zenodo.4591042	Transcriptome	-
p_thalassiosira_spp_7_Aureo2	Ochrophyta	Coscinodiscophycidae	Thalassiosira	Thalassiosira spp	Photosynthetic Stramenopile	Polar	Aureochrome 2	10.5281/zenodo.4591043	Transcriptome	-
p_thalassiosira_spp_9_Aureo1c	Ochrophyta	Coscinodiscophycidae	Thalassiosira	Thalassiosira spp	Photosynthetic Stramenopile	Polar	Aureochrome 1c	10.5281/zenodo.4591044	Transcriptome	-
Phatr3_AUREO1a_Aureo1a	Ochrophyta	Bacillariophycidae	Phaeodactylum	Phaeodactylum tricornutum	Photosynthetic Stramenopile	Non-polar	Aureochrome 1a	JGI (https://mycocosm.jgi.doe.gov/phatr2/phatr2home.html)	Genome	-
Phatr3_AUREO1b_Aureo1b	Ochrophyta	Bacillariophycidae	Phaeodactylum	Phaeodactylum tricornutum	Photosynthetic Stramenopile	Non-polar	Aureochrome 1b	JGI (https://mycocosm.jgi.doe.gov/phatr2/phatr2home.html)	Genome	-
Phatr3_AUREO1c_Aureo1c	Ochrophyta	Bacillariophycidae	Phaeodactylum	Phaeodactylum tricornutum	Photosynthetic Stramenopile	Non-polar	Aureochrome 1c	JGI (https://mycocosm.jgi.doe.gov/phatr2/phatr2home.html)	Genome	-
Phatr3_AUREO2_Aureo2	Ochrophyta	Bacillariophycidae	Phaeodactylum	Phaeodactylum tricornutum	Photosynthetic Stramenopile	Non-polar	Aureochrome 2	JGI (https://mycocosm.jgi.doe.gov/phatr2/phatr2home.html)	Genome	-
Platysulcus_tardus_Aureo	Platysulcea	Platysulcea	Platysulcus	Platysulcus tardus	Non-Photosynthetic Stramenopile	Non-polar	Aureochrome 2	EukProt	Transcriptome	EP00753
t_Chaetoceros_curvisetus_1_Aureo2	Ochrophyta	Coscinodiscophycidae	Chaetoceros	Chaetoceros curvisetus	Photosynthetic Stramenopile	Non-polar	Aureochrome 2	EukProt	Transcriptome	EP00553
t_Chaetoceros_curvisetus_2_Aureo1c	Ochrophyta	Coscinodiscophycidae	Chaetoceros	Chaetoceros curvisetus	Photosynthetic Stramenopile	Non-polar	Aureochrome 1c	EukProt	Transcriptome	EP00553
t_Chaetoceros_curvisetus_3_Aureo1b	Ochrophyta	Coscinodiscophycidae	Chaetoceros	Chaetoceros curvisetus	Photosynthetic Stramenopile	Non-polar	Aureochrome 1b	EukProt	Transcriptome	EP00553
t_Fragilariopsis_kerguelensis_1_Aureo2	Ochrophyta	Bacillariophycidae	Fragilariopsis	Fragilariopsis kerguelensis	Photosynthetic Stramenopile	Non-polar	Aureochrome 2	EukProt	Transcriptome	EP00751
t_Fragilariopsis_kerguelensis_2_Aureo1b	Ochrophyta	Bacillariophycidae	Fragilariopsis	Fragilariopsis kerguelensis	Photosynthetic Stramenopile	Non-polar	Aureochrome 1b	EukProt	Transcriptome	EP00751
t_Fragilariopsis_kerguelensis_3_Aureo1a	Ochrophyta	Bacillariophycidae	Fragilariopsis	Fragilariopsis kerguelensis	Photosynthetic Stramenopile	Non-polar	Aureochrome 1a	EukProt	Transcriptome	EP00751
t_minidiscus_comicus_1_Aureo2	Ochrophyta	Coscinodiscophycidae	Minidiscus	Minidiscus comicus	Photosynthetic Stramenopile	Non-polar	Aureochrome 2	10.5281/zenodo.4591036	Transcriptome	-
t_minidiscus_comicus_3_Aureo1c	Ochrophyta	Coscinodiscophycidae	Minidiscus	Minidiscus comicus	Photosynthetic Stramenopile	Non-polar	Aureochrome 1c	10.5281/zenodo.4591037	Transcriptome	-
t_minidiscus_comicus_6_Aureo1b	Ochrophyta	Coscinodiscophycidae	Minidiscus	Minidiscus comicus	Photosynthetic Stramenopile	Non-polar	Aureochrome 1b	10.5281/zenodo.4591038	Transcriptome	-
t_minidiscus_comicus_8_Aureo1a	Ochrophyta	Coscinodiscophycidae	Minidiscus	Minidiscus comicus	Photosynthetic Stramenopile	Non-polar	Aureochrome 1a	10.5281/zenodo.4591039	Transcriptome	-
t_minidiscus_spinulatus_2_Aureo2	Ochrophyta	Coscinodiscophycidae	Minidiscus	Minidiscus spinulatus	Photosynthetic Stramenopile	Non-polar	Aureochrome 2	10.5281/zenodo.4591040	Transcriptome	-
t_minidiscus_spinulatus_4_Aureo1c	Ochrophyta	Coscinodiscophycidae	Minidiscus	Minidiscus spinulatus	Photosynthetic Stramenopile	Non-polar	Aureochrome 1c	10.5281/zenodo.4591041	Transcriptome	-
t_minidiscus_spinulatus_6_Aureo1b	Ochrophyta	Coscinodiscophycidae	Minidiscus	Minidiscus spinulatus	Photosynthetic Stramenopile	Non-polar	Aureochrome 1b	10.5281/zenodo.4591042	Transcriptome	-
t_minidiscus_spinulatus_7_Aureo1a	Ochrophyta	Coscinodiscophycidae	Minidiscus	Minidiscus spinulatus	Photosynthetic Stramenopile	Non-polar	Aureochrome 1a	10.5281/zenodo.4591043	Transcriptome	-
t_minidiscus_variabilis_1_Aureo2	Ochrophyta	Coscinodiscophycidae	Minidiscus	Minidiscus variabilis	Photosynthetic Stramenopile	Non-polar	Aureochrome 2	10.5281/zenodo.4591044	Transcriptome	-
t_minidiscus_variabilis_2_Aureo1c	Ochrophyta	Coscinodiscophycidae	Minidiscus	Minidiscus variabilis	Photosynthetic Stramenopile	Non-polar	Aureochrome 1c	10.5281/zenodo.4591045	Transcriptome	-
t_minidiscus_variabilis_3_Aureo1b	Ochrophyta	Coscinodiscophycidae	Minidiscus	Minidiscus variabilis	Photosynthetic Stramenopile	Non-polar	Aureochrome 1b	10.5281/zenodo.4591046	Transcriptome	-
t_minidiscus_variabilis_5_Aureo1a	Ochrophyta	Coscinodiscophycidae	Minidiscus	Minidiscus variabilis	Photosynthetic Stramenopile	Non-polar	Aureochrome 1a	10.5281/zenodo.4591047	Transcriptome	-
t_Odontella_aurita_3_Aureo2	Ochrophyta	Coscinodiscophycidae	Odontella	Odontella aurita	Photosynthetic Stramenopile	Non-polar	Aureochrome 2	EukProt	Transcriptome	EP00566
t_Odontella_aurita_4_Aureo1a	Ochrophyta	Coscinodiscophycidae	Odontella	Odontella aurita	Photosynthetic Stramenopile	Non-polar	Aureochrome 1a	EukProt	Transcriptome	EP00566
t_Odontella_aurita_5_Aureo1c	Ochrophyta	Coscinodiscophycidae	Odontella	Odontella aurita	Photosynthetic Stramenopile	Non-polar	Aureochrome 1c	EukProt	Transcriptome	EP00566
t_Odontella_aurita_6_Aureo1b	Ochrophyta	Coscinodiscophycidae	Odontella	Odontella aurita	Photosynthetic Stramenopile	Non-polar	Aureochrome 1b	EukProt	Transcriptome	EP00566
t_Pseudo-nitzschia_arenysensis_1_Aureo2	Ochrophyta	Bacillariophycidae	Pseudo-Nitzschia	Pseudo_Nitzschia arenysensis	Photosynthetic Stramenopile	Non-polar	Aureochrome 2	EukProt	Transcriptome	EP00531
t_Pseudo-nitzschia_arenysensis_2_Aureo1b	Ochrophyta	Bacillariophycidae	Pseudo-Nitzschia	Pseudo_Nitzschia arenysensis	Photosynthetic Stramenopile	Non-polar	Aureochrome 1b	EukProt	Transcriptome	EP00531
t_Pseudo-nitzschia_arenysensis_4_Aureo1a	Ochrophyta	Bacillariophycidae	Pseudo-Nitzschia	Pseudo_Nitzschia arenysensis	Photosynthetic Stramenopile	Non-polar	Aureochrome 1a	EukProt	Transcriptome	EP00531
t_Pseudo-nitzschia_australis_1_Aureo2	Ochrophyta	Bacillariophycidae	Pseudo-Nitzschia	Pseudo_Nitzschia australis	Photosynthetic Stramenopile	Non-polar	Aureochrome 2	EukProt	Transcriptome	EP00532
t_Pseudo-nitzschia_australis_2_Aureo1b	Ochrophyta	Bacillariophycidae	Pseudo-Nitzschia	Pseudo_Nitzschia australis	Photosynthetic Stramenopile	Non-polar	Aureochrome 1b	EukProt	Transcriptome	EP00532
t_Pseudo-nitzschia_australis_3_Aureo1a	Ochrophyta	Bacillariophycidae	Pseudo-Nitzschia	Pseudo_Nitzschia australis	Photosynthetic Stramenopile	Non-polar	Aureochrome 1a	EukProt	Transcriptome	EP00532
t_Pseudo-nitzschia_multiseries_1_Aureo1b	Ochrophyta	Bacillariophycidae	Pseudo-Nitzschia	Pseudo_Nitzschia multiseries	Photosynthetic Stramenopile	Non-polar	Aureochrome 1b	JGI (https://mycocosm.jgi.doe.gov/Psemu1/Psemu1.home.html	Genome	-
t_Pseudo-nitzschia_multiseries_3_Aureo1a	Ochrophyta	Bacillariophycidae	Pseudo-Nitzschia	Pseudo_Nitzschia multiseries	Photosynthetic Stramenopile	Non-polar	Aureochrome 1a	JGI (https://mycocosm.jgi.doe.gov/Psemu1/Psemu1.home.html	Genome	-
t_Thalassionema_frauenfeldii_1_Aureo1b	Ochrophyta	Fragilariophycidae	Thalassionema	Thalassionema frauenfeldii	Photosynthetic Stramenopile	Non-polar	Aureochrome 1b	EukProt	Transcriptome	EP00546
t_Thalassionema_frauenfeldii_2_Aureo1a	Ochrophyta	Fragilariophycidae	Thalassionema	Thalassionema frauenfeldii	Photosynthetic Stramenopile	Non-polar	Aureochrome 1a	EukProt	Transcriptome	EP00546
t_thalassiosira_gravida_1_Aureo2	Ochrophyta	Coscinodiscophycidae	Thalassiosira	Thalassiosira gravida	Photosynthetic Stramenopile	Non-polar	Aureochrome 2	EukProt	Transcriptome	EP00585
t_Thalassiosira_gravida_2_Aureo1c	Ochrophyta	Coscinodiscophycidae	Thalassiosira	Thalassiosira gravida	Photosynthetic Stramenopile	Non-polar	Aureochrome 1c	EukProt	Transcriptome	EP00585
t_Thalassiosira_gravida_3_Aureo1b	Ochrophyta	Coscinodiscophycidae	Thalassiosira	Thalassiosira gravida	Photosynthetic Stramenopile	Non-polar	Aureochrome 1b	EukProt	Transcriptome	EP00585
t_thalassiosira_minima_5_Aureo1b	Ochrophyta	Coscinodiscophycidae	Thalassiosira	Thalassiosira minima	Photosynthetic Stramenopile	Non-polar	Aureochrome 1b	EukProt	Transcriptome	EP00588
t_Thalassiosira_oceanica_1_Aureo1a	Ochrophyta	Coscinodiscophycidae	Thalassiosira	Thalassiosira minima	Photosynthetic Stramenopile	Non-polar	Aureochrome 1a	EukProt	Genome	EP00582
t_Thalassiosira_oceanica_1_Aureo1a	Ochrophyta	Coscinodiscophycidae	Thalassiosira	Thalassiosira oceanica	Photosynthetic Stramenopile	Non-polar	Aureochrome 1a	EukProt	Genome	EP00582
t_Thalassiosira_oceanica_2_Aureo1b	Ochrophyta	Coscinodiscophycidae	Thalassiosira	Thalassiosira oceanica	Photosynthetic Stramenopile	Non-polar	Aureochrome 1b	EukProt	Genome	EP00582
t_Thalassiosira_oceanica_3_Aureo1c	Ochrophyta	Coscinodiscophycidae	Thalassiosira	Thalassiosira oceanica	Photosynthetic Stramenopile	Non-polar	Aureochrome 1c	EukProt	Genome	EP00582
t_thalassiosira_pseudonana_1_Aureo2	Ochrophyta	Coscinodiscophycidae	Thalassiosira	Thalassiosira pseudonana	Photosynthetic Stramenopile	Non-polar	Aureochrome 2	EukProt	Genome	EP1082
t_Thalassiosira_pseudonana_2_Aureo1c	Ochrophyta	Coscinodiscophycidae	Thalassiosira	Thalassiosira pseudonana	Photosynthetic Stramenopile	Non-polar	Aureochrome 1c	EukProt	Genome	EP1082
t_Thalassiosira_pseudonana_4_Aureo1b	Ochrophyta	Coscinodiscophycidae	Thalassiosira	Thalassiosira pseudonana	Photosynthetic Stramenopile	Non-polar	Aureochrome 1b	EukProt	Genome	EP1082
t_Thalassiosira_pseudonana_5_Aureo1a	Ochrophyta	Coscinodiscophycidae	Thalassiosira	Thalassiosira pseudonana	Photosynthetic Stramenopile	Non-polar	Aureochrome 1a	EukProt	Genome	EP1082
Vaucheria_litorea_P000063	Ochrophyta	Xanthophyceae	Vaucheria	Vaucheria litorea	Photosynthetic Stramenopile	Non-polar	Aureochrome 2	EukProt	Genome	EP00612
Vaucheria_litorea_P001868	Ochrophyta	Xanthophyceae	Vaucheria	Vaucheria litorea	Photosynthetic Stramenopile	Non-polar	Aureochrome 1a	EukProt	Genome	EP00612
Vaucheria_litorea_P003999	Ochrophyta	Xanthophyceae	Vaucheria	Vaucheria litorea	Photosynthetic Stramenopile	Non-polar	Aureochrome 2	EukProt	Genome	EP00612
Vaucheria_litorea_P007381	Ochrophyta	Xanthophyceae	Vaucheria	Vaucheria litorea	Photosynthetic Stramenopile	Non-polar	Aureochrome 1c	EukProt	Genome	EP00612
Vaucheria_litorea_P008734	Ochrophyta	Xanthophyceae	Vaucheria	Vaucheria litorea	Photosynthetic Stramenopile	Non-polar	Aureochrome 1a	EukProt	Genome	EP00612
MAST3A_Aureochrome2	MAST	Opalozoa	MAST3A	MAST3A	Non-Photosynthetic Stramenopile	Non-polar	Aureochrome 2	ttps://doi.org/10.1038/s41396-020-00885-8	Transcriptome	-
MAST3C_Aureochrome2	MAST	Opalozoa	MAST3C	MAST3C	Non-Photosynthetic Stramenopile	Non-polar	Aureochrome 2	ttps://doi.org/10.1038/s41396-020-00885-9	Transcriptome	-
