# Supplementary material
Source: Research Square preprint supplement (doi:10.21203/rs.3.rs-9010570/v1)
Supplement: Supplementary file 3 [file e67c8471a0bcfc1ff9d6912c.xlsx]

## Sheet: Sheet1
AUREO_ISOFORM	TAX_LIN_1	TAX_LIN_2	TAX_LIN_3	TAX_LIN_4	EukProt_ID
AUREO_1a	Chrysista	Chrysophyceae	Chromulinales	Chromulinaceae	EP00595_Chromulina_sp_UTEXLB2642_P000223
AUREO_1a	Chrysista	Chrysophyceae	Chromulinales	Chromulinaceae	EP01035_Chromulina_nebulosa_P019101
AUREO_1a	Chrysista	Chrysophyceae	Chromulinales	Chromulinaceae	EP01035_Chromulina_nebulosa_P025771
AUREO_1a	Chrysista	Chrysophyceae	Hydrurales	Hydruraceae	EP00596_Hydrurales_sp_CCMP1899_P008683
AUREO_1a	Chrysista	Chrysophyceae	Hydrurales	Hydruraceae	EP00596_Hydrurales_sp_CCMP1899_P010221
AUREO_1a	Chrysista	Chrysophyceae	Ochromonadales	Ochromonadaceae	EP00981_Chlorochromonas_danica_P006294
AUREO_1a	Chrysista	Chrysophyceae	Ochromonadales	Ochromonadaceae	EP01031_Cornospumella_fuschlensis_P026450
AUREO_1a	Chrysista	Chrysophyceae	Ochromonadales	Ochromonadaceae	EP01033_Poteriospumella_lacustris_P009186
AUREO_1a	Chrysista	Chrysophyceae	Ochromonadales	Ochromonadaceae	EP01036_Dinobryon_divergens_P025909
AUREO_1a	Chrysista	Chrysophyceae	Ochromonadales	Ochromonadaceae	EP01038_Epipyxis_sp_PR26KG_P004623
AUREO_1a	Chrysista	Chrysophyceae	Ochromonadales	Ochromonadaceae	EP01039_Chlorochromonas_danica_P000482
AUREO_1a	Chrysista	Chrysophyceae	Ochromonadales	Ochromonadaceae	EP01040_Poterioochromonas_malhamensis_P000003
AUREO_1a	Chrysista	Chrysophyceae	Ochromonadales	Ochromonadaceae	EP01040_Poterioochromonas_malhamensis_P010418
AUREO_1a	Chrysista	Chrysophyceae	Ochromonadales	Ochromonadales_clade-VIII	EP00601_Ochromonadales_sp_CCMP2298_P002777
AUREO_1a	Chrysista	Chrysophyceae	Synurales	Synuraceae	EP01041_Mallomonas_annulata_P000908
AUREO_1a	Chrysista	Eustigmatophyceae	Eustigmatales	Monodopsidaceae	EP00623_Microchloropsis_gaditana_P001591
AUREO_1a	Chrysista	Phaeophyceae	Ectocarpales	Chordariaceae	EP00752_Nemacystus_decipiens_P006861
AUREO_1a	Chrysista	Phaeophyceae	Ectocarpales	Chordariaceae	EP00752_Nemacystus_decipiens_P018219
AUREO_1a	Chrysista	Phaeophyceae	Ectocarpales	Ectocarpaceae	EP00609_Ectocarpus_siliculosus_P000431
AUREO_1a	Chrysista	Phaeophyceae	Ectocarpales	Ectocarpaceae	EP00609_Ectocarpus_siliculosus_P013731
AUREO_1a	Chrysista	Phaeophyceae	Ectocarpales	Ectocarpaceae	EP00903_Cladosiphon_okamuranus_P006909
AUREO_1a	Chrysista	Phaeophyceae	Ectocarpales	Ectocarpaceae	EP00903_Cladosiphon_okamuranus_P015111
AUREO_1a	Chrysista	Phaeophyceae	Ectocarpales	Ectocarpaceae	EP00903_Cladosiphon_okamuranus_P015112
AUREO_1a	Chrysista	Phaeophyceae	Laminariales	Alariaceae	EP00904_Undaria_pinnatifida_P004459
AUREO_1a	Chrysista	Phaeophyceae	Laminariales	Alariaceae	EP00904_Undaria_pinnatifida_P006447
AUREO_1a	Chrysista	Pinguiophyceae	Pinguiochrysidales	Pinguiochrysidaceae	EP00636_Phaeomonas_parva_P000984
AUREO_1a	Chrysista	Pinguiophyceae	Pinguiochrysidales	Pinguiochrysidaceae	EP00636_Phaeomonas_parva_P017552
AUREO_1a	Chrysista	Pinguiophyceae	Pinguiochrysidales	Pinguiochrysidaceae	EP00968_Pinguiococcus_pyrenoidosus_P010359
AUREO_1a	Chrysista	Raphidophyceae	Chattonellales	Chattonellaceae	EP00638_Chattonella_subsalsa_P000448
AUREO_1a	Chrysista	Raphidophyceae	Chattonellales	Chattonellaceae	EP00638_Chattonella_subsalsa_P005061
AUREO_1a	Chrysista	Raphidophyceae	Chattonellales	Chattonellaceae	EP00638_Chattonella_subsalsa_P014547
AUREO_1a	Chrysista	Raphidophyceae	Chattonellales	Chattonellaceae	EP00639_Heterosigma_akashiwo_P005828
AUREO_1a	Chrysista	Raphidophyceae	Chattonellales	Chattonellaceae	EP00639_Heterosigma_akashiwo_P035509
AUREO_1a	Chrysista	Raphidophyceae	Chattonellales	Chattonellaceae	EP00640_Fibrocapsa_japonica_P000230
AUREO_1a	Chrysista	Raphidophyceae	Chattonellales	Chattonellaceae	EP00640_Fibrocapsa_japonica_P003216
AUREO_1a	Chrysista	Synchromophyceae	Synchromadales	Synchromaceae	EP00608_Synchroma_pusillum_P004081
AUREO_1a	Chrysista	Xanthophyceae	Tribonematales	Tribonemataceae	EP00611_Tribonema_gayanum_P025740
AUREO_1a	Chrysista	Xanthophyceae	Vaucheriales	Vaucheriaceae	EP00612_Vaucheria_litorea_P001868
AUREO_1a	Chrysista	Xanthophyceae	Vaucheriales	Vaucheriaceae	EP00612_Vaucheria_litorea_P008734
AUREO_1a	Diatomista	Bacillariophyceae	Bacillariales	Bacillariaceae	EP00526_Cylindrotheca_closterium_P018471
AUREO_1a	Diatomista	Bacillariophyceae	Bacillariales	Bacillariaceae	EP00528_Fragilariopsis_cylindrus_P012808
AUREO_1a	Diatomista	Bacillariophyceae	Bacillariales	Bacillariaceae	EP00531_Pseudo-nitzschia_arenysensis_P000043
AUREO_1a	Diatomista	Bacillariophyceae	Bacillariales	Bacillariaceae	EP00531_Pseudo-nitzschia_arenysensis_P000058
AUREO_1a	Diatomista	Bacillariophyceae	Bacillariales	Bacillariaceae	EP00536_Pseudo-nitzschia_multiseries_P013785
AUREO_1a	Diatomista	Bacillariophyceae	Bacillariales	Bacillariaceae	EP00539_Tryblionella_compressa_P019227
AUREO_1a	Diatomista	Bacillariophyceae	Cyclophorales	Cyclophoraceae	EP00540_Astrosyne_radiata_P013754
AUREO_1a	Diatomista	Bacillariophyceae	Cyclophorales	Cyclophoraceae	EP00540_Astrosyne_radiata_P014101
AUREO_1a	Diatomista	Bacillariophyceae	Cyclophorales	Cyclophoraceae	EP00541_Cyclophora_tenuis_P005469
AUREO_1a	Diatomista	Bacillariophyceae	Cyclophorales	Cyclophoraceae	EP00541_Cyclophora_tenuis_P019668
AUREO_1a	Diatomista	Bacillariophyceae	Fragilariales	Fragilariaceae	EP00544_Gedaniella_sp_CCMP2646_P009555
AUREO_1a	Diatomista	Bacillariophyceae	Fragilariales	Fragilariaceae	EP00545_Synedropsis_sp_CCMP1620_P009543
AUREO_1a	Diatomista	Bacillariophyceae	Licmophorales	Licmophoraceae	EP00543_Licmophora_paradoxa_P011961
AUREO_1a	Diatomista	Bacillariophyceae	Naviculales	Naviculaceae	EP00525_Craspedostauros_australis_P012379
AUREO_1a	Diatomista	Bacillariophyceae	Naviculales	Naviculaceae	EP00797_Seminavis_robusta_P029644
AUREO_1a	Diatomista	Bacillariophyceae	Naviculales	Stauroneidaceae	EP00538_Stauroneis_constricta_P011756
AUREO_1a	Diatomista	Bacillariophyceae	Naviculales	Stauroneidaceae	EP00902_Fistulifera_solaris_P002560
AUREO_1a	Diatomista	Bacillariophyceae	Naviculales	Stauroneidaceae	EP00902_Fistulifera_solaris_P011627
AUREO_1a	Diatomista	Bacillariophyceae	Rhabdonematales	Grammatophoraceae	EP00542_Grammatophora_oceanica_P012450
AUREO_1a	Diatomista	Bacillariophyceae	Rhaphoneidales	Asterionellopsidaceae	EP00521_Asterionellopsis_glacialis_P016067
AUREO_1a	Diatomista	Bacillariophyceae	Striatellales	Striatellaceae	EP00549_Striatella_unipunctata_P015284
AUREO_1a	Diatomista	Bacillariophyceae	Surirellales	Entomoneidaceae	EP00522_Entomoneis_paludosa_P006545
AUREO_1a	Diatomista	Bacillariophyceae	Thalassionematales	Thalassionemataceae	EP00546_Thalassionema_frauenfeldii_P007107
AUREO_1a	Diatomista	Bacillariophyceae	Thalassionematales	Thalassionemataceae	EP00546_Thalassionema_frauenfeldii_P012402
AUREO_1a	Diatomista	Bacillariophyceae	Thalassionematales	Thalassionemataceae	EP00548_Thalassiothrix_antarctica_P005394
AUREO_1a	Diatomista	Bacillariophyceae	Thalassiophysales	Catenulaceae	EP00977_Amphora_coffeiformis_P002232
AUREO_1a	Diatomista	Bacillariophyceae	Thalassiophysales	Catenulaceae	EP00977_Amphora_coffeiformis_P029866
AUREO_1a	Diatomista	Bolidophyceae	Parmales	Triparmaceae	EP00518_Triparma_eleuthera_P012354
AUREO_1a	Diatomista	Coscinodiscophyceae	Aulacoseirales	Aulacoseiraceae	EP00590_Aulacoseira_subarctica_P002392
AUREO_1a	Diatomista	Coscinodiscophyceae	Aulacoseirales	Aulacoseiraceae	EP00590_Aulacoseira_subarctica_P007019
AUREO_1a	Diatomista	Coscinodiscophyceae	Corethrales	Corethraceae	EP00587_Corethron_hystrix_P004106
AUREO_1a	Diatomista	Coscinodiscophyceae	Coscinodiscales	Coscinodiscaceae	EP00586_Coscinodiscus_wailesii_P012574
AUREO_1a	Diatomista	Coscinodiscophyceae	Coscinodiscales	Coscinodiscaceae	EP00586_Coscinodiscus_wailesii_P021602
AUREO_1a	Diatomista	Coscinodiscophyceae	Rhizosoleniales	Rhizosoleniaceae	EP00559_Dactyliosolen_fragilissimus_P009856
AUREO_1a	Diatomista	Coscinodiscophyceae	Rhizosoleniales	Rhizosoleniaceae	EP00594_Rhizosolenia_setigera_P009295
AUREO_1a	Diatomista	Coscinodiscophyceae	Stephanopyxales	Stephanopyxidaceae	EP00591_Stephanopyxis_turris_P007756
AUREO_1a	Diatomista	Dictyochophyceae	Dictyochales	Dictychaceae	EP00617_Octactis_speculum_P020213
AUREO_1a	Diatomista	Dictyochophyceae	Florenciellales	Floreciellaceae	EP00618_Florenciella_parvula_P018100
AUREO_1a	Diatomista	Dictyochophyceae	Florenciellales	Floreciellaceae	EP00618_Florenciella_parvula_P032291
AUREO_1a	Diatomista	Dictyochophyceae	Pedinellales	Pedinellaceae	EP00613_Pedinella_sp_CCMP2098_P001915
AUREO_1a	Diatomista	Dictyochophyceae	Pedinellales	Pedinellaceae	EP00613_Pedinella_sp_CCMP2098_P003565
AUREO_1a	Diatomista	Dictyochophyceae	Pedinellales	Pedinellaceae	EP00613_Pedinella_sp_CCMP2098_P073032
AUREO_1a	Diatomista	Dictyochophyceae	Pedinellales	Pedinellaceae	EP00614_Pseudopedinella_elastica_P005231
AUREO_1a	Diatomista	Dictyochophyceae	Rhizochromulinales	Rhizochromulinaceae	EP00616_Rhizochromulina_sp_CCMP1243_P007381
AUREO_1a	Diatomista	Mediophyceae	Biddulphiales	Attheyaceae	EP00550_Attheya_septentrionalis_P010347
AUREO_1a	Diatomista	Mediophyceae	Chaetocerotales	Chaetocerotaceae	EP00551_Chaetoceros_affinis_P002624
AUREO_1a	Diatomista	Mediophyceae	Chaetocerotales	Chaetocerotaceae	EP00554_Chaetoceros_debilis_P007382
AUREO_1a	Diatomista	Mediophyceae	Chaetocerotales	Leptocylindraceae	EP00815_Leptocylindrus_aporus_P006229
AUREO_1a	Diatomista	Mediophyceae	Chaetocerotales	Leptocylindraceae	EP00815_Leptocylindrus_aporus_P006419
AUREO_1a	Diatomista	Mediophyceae	Chaetocerotales	Leptocylindraceae	EP00815_Leptocylindrus_aporus_P013001
AUREO_1a	Diatomista	Mediophyceae	Cymatosirales	Cymatosiraceae	EP00562_Extubocellulus_spinifer_P002565
AUREO_1a	Diatomista	Mediophyceae	Cymatosirales	Cymatosiraceae	EP00563_Minutocellus_polymorphus_P017782
AUREO_1a	Diatomista	Mediophyceae	Eupodiscales	Odontellaceae	EP00566_Odontella_aurita_P012017
AUREO_1a	Diatomista	Mediophyceae	Eupodiscales	Parodontellaceae	EP00568_Trieres_chinensis_P017919
AUREO_1a	Diatomista	Mediophyceae	Hemiaulales	Hemiaulaceae	EP00560_Eucampia_antarctica_P007514
AUREO_1a	Diatomista	Mediophyceae	Lithodesmiales	Lithodesmiaceae	EP00565_Helicotheca_tamesis_P000803
AUREO_1a	Diatomista	Mediophyceae	Probosciales	Probosciaceae	EP00592_Proboscia_alata_P006973
AUREO_1a	Diatomista	Mediophyceae	Thalassiosirales	Skeletonemaceae	EP00984_Skeletonema_dohrnii_P038334
AUREO_1a	Diatomista	Mediophyceae	Thalassiosirales	Stephanodiscaceae	EP00804_Cyclotella_cryptica_P016759
AUREO_1a	Diatomista	Mediophyceae	Thalassiosirales	Thalassiosiraceae	EP00569_Conticribra_weissflogii_P012607
AUREO_1a	Diatomista	Mediophyceae	Thalassiosirales	Thalassiosiraceae	EP00571_Detonula_confervacea_P012375
AUREO_1a	Diatomista	Mediophyceae	Thalassiosirales	Thalassiosiraceae	EP00579_Thalassiosira_antarctica_P004847
AUREO_1a	Diatomista	Mediophyceae	Thalassiosirales	Thalassiosiraceae	EP01082_Thalassiosira_pseudonana_P014092
AUREO_1a	Diatomista	Pelagophyceae	Pelagomonadales	Pelagomonadales_clade_A	EP00629_Pelagomonadales_sp_RCC1024_P003914
AUREO_1a	Diatomista	Pelagophyceae	Pelagomonadales	Pelagomonadales_clade_A	EP00629_Pelagomonadales_sp_RCC1024_P006752
AUREO_1a	Diatomista	Pelagophyceae	Pelagophyceae_x	Pelagophyceae_xx	EP00628_Pelagophyceae_sp_CCMP2097_P037902
AUREO_1a	Diatomista	Pelagophyceae	Sarcinochrysidales	Chrysocystaceae	EP00605_Chrysophyceae_sp_TOSAG23-4_P001144
AUREO_1a	Diatomista	Pelagophyceae	Sarcinochrysidales	Chrysocystaceae	EP00631_Chrysoreinhardia_giraudii_P007729
AUREO_1a	Diatomista	Pelagophyceae	Sarcinochrysidales	Sarcinochrysidaceae	EP00633_Aureoumbra_lagunensis_P001526
AUREO_1a	Diatomista	Pelagophyceae	Sarcinochrysidales	Sarcinochrysidaceae	EP00634_Sargassococcus_sp_CCMP2135_P002558
AUREO_1a	Diatomista	Pelagophyceae	Sarcinochrysidales	Sarcinochrysidaceae	EP00635_Sarcinochrysidales_sp_CCMP3193_P000309
AUREO_1b	Chrysista	Ectocarpaceae	Ectocarpaceae	Ectocarpaceae	EP00903_Cladosiphon_okamuranus_P008784
AUREO_1b	Chrysista	Phaeophyceae	Ectocarpales	Chordariaceae	EP00752_Nemacystus_decipiens_P006467
AUREO_1b	Chrysista	Phaeophyceae	Ectocarpales	Chordariaceae	EP00752_Nemacystus_decipiens_P006468
AUREO_1b	Diatomista	Bacillariophyceae	Bacillariales	Bacillariaceae	EP00526_Cylindrotheca_closterium_P012886
AUREO_1b	Diatomista	Bacillariophyceae	Bacillariales	Bacillariaceae	EP00528_Fragilariopsis_cylindrus_P016011
AUREO_1b	Diatomista	Bacillariophyceae	Bacillariales	Bacillariaceae	EP00531_Pseudo-nitzschia_arenysensis_P003934
AUREO_1b	Diatomista	Bacillariophyceae	Bacillariales	Bacillariaceae	EP00531_Pseudo-nitzschia_arenysensis_P003935
AUREO_1b	Diatomista	Bacillariophyceae	Bacillariales	Bacillariaceae	EP00536_Pseudo-nitzschia_multiseries_P001768
AUREO_1b	Diatomista	Bacillariophyceae	Bacillariales	Bacillariaceae	EP00539_Tryblionella_compressa_P012613
AUREO_1b	Diatomista	Bacillariophyceae	Bacillariales	Bacillariaceae	EP00539_Tryblionella_compressa_P016613
AUREO_1b	Diatomista	Bacillariophyceae	Cyclophorales	Cyclophoraceae	EP00541_Cyclophora_tenuis_P000050
AUREO_1b	Diatomista	Bacillariophyceae	Cyclophorales	Cyclophoraceae	EP00541_Cyclophora_tenuis_P003222
AUREO_1b	Diatomista	Bacillariophyceae	Fragilariales	Fragilariaceae	EP00544_Gedaniella_sp_CCMP2646_P005658
AUREO_1b	Diatomista	Bacillariophyceae	Licmophorales	Licmophoraceae	EP00543_Licmophora_paradoxa_P013940
AUREO_1b	Diatomista	Bacillariophyceae	Naviculales	Naviculaceae	EP00797_Seminavis_robusta_P003096
AUREO_1b	Diatomista	Bacillariophyceae	Naviculales	Stauroneidaceae	EP00538_Stauroneis_constricta_P013241
AUREO_1b	Diatomista	Bacillariophyceae	Naviculales	Stauroneidaceae	EP00902_Fistulifera_solaris_P000206
AUREO_1b	Diatomista	Bacillariophyceae	Naviculales	Stauroneidaceae	EP00902_Fistulifera_solaris_P011055
AUREO_1b	Diatomista	Bacillariophyceae	Rhabdonematales	Grammatophoraceae	EP00542_Grammatophora_oceanica_P020038
AUREO_1b	Diatomista	Bacillariophyceae	Rhaphoneidales	Asterionellopsidaceae	EP00521_Asterionellopsis_glacialis_P006394
AUREO_1b	Diatomista	Bacillariophyceae	Striatellales	Striatellaceae	EP00549_Striatella_unipunctata_P007870
AUREO_1b	Diatomista	Bacillariophyceae	Surirellales	Entomoneidaceae	EP00522_Entomoneis_paludosa_P012915
AUREO_1b	Diatomista	Bacillariophyceae	Thalassionematales	Thalassionemataceae	EP00546_Thalassionema_frauenfeldii_P014943
AUREO_1b	Diatomista	Bacillariophyceae	Thalassionematales	Thalassionemataceae	EP00548_Thalassiothrix_antarctica_P014543
AUREO_1b	Diatomista	Bacillariophyceae	Thalassiophysales	Catenulaceae	EP00977_Amphora_coffeiformis_P017557
AUREO_1b	Diatomista	Coscinodiscophyceae	Aulacoseirales	Aulacoseiraceae	EP00590_Aulacoseira_subarctica_P002294
AUREO_1b	Diatomista	Coscinodiscophyceae	Corethrales	Corethraceae	EP00587_Corethron_hystrix_P001941
AUREO_1b	Diatomista	Coscinodiscophyceae	Corethrales	Corethraceae	EP00587_Corethron_hystrix_P007346
AUREO_1b	Diatomista	Coscinodiscophyceae	Rhizosoleniales	Rhizosoleniaceae	EP00559_Dactyliosolen_fragilissimus_P005412
AUREO_1b	Diatomista	Coscinodiscophyceae	Rhizosoleniales	Rhizosoleniaceae	EP00594_Rhizosolenia_setigera_P015797
AUREO_1b	Diatomista	Coscinodiscophyceae	Stephanopyxales	Stephanopyxidaceae	EP00591_Stephanopyxis_turris_P011901
AUREO_1b	Diatomista	Mediophyceae	Biddulphiales	Attheyaceae	EP00550_Attheya_septentrionalis_P000636
AUREO_1b	Diatomista	Mediophyceae	Chaetocerotales	Chaetocerotaceae	EP00551_Chaetoceros_affinis_P003570
AUREO_1b	Diatomista	Mediophyceae	Chaetocerotales	Chaetocerotaceae	EP00554_Chaetoceros_debilis_P001566
AUREO_1b	Diatomista	Mediophyceae	Chaetocerotales	Leptocylindraceae	EP00815_Leptocylindrus_aporus_P002274
AUREO_1b	Diatomista	Mediophyceae	Cymatosirales	Cymatosiraceae	EP00561_Arcocellulus_cornucervis_P004669
AUREO_1b	Diatomista	Mediophyceae	Cymatosirales	Cymatosiraceae	EP00562_Extubocellulus_spinifer_P004463
AUREO_1b	Diatomista	Mediophyceae	Cymatosirales	Cymatosiraceae	EP00562_Extubocellulus_spinifer_P022555
AUREO_1b	Diatomista	Mediophyceae	Cymatosirales	Cymatosiraceae	EP00563_Minutocellus_polymorphus_P004175
AUREO_1b	Diatomista	Mediophyceae	Eupodiscales	Odontellaceae	EP00566_Odontella_aurita_P012107
AUREO_1b	Diatomista	Mediophyceae	Eupodiscales	Odontellaceae	EP00566_Odontella_aurita_P037607
AUREO_1b	Diatomista	Mediophyceae	Eupodiscales	Odontellaceae	EP00566_Odontella_aurita_P037609
AUREO_1b	Diatomista	Mediophyceae	Eupodiscales	Parodontellaceae	EP00568_Trieres_chinensis_P015773
AUREO_1b	Diatomista	Mediophyceae	Hemiaulales	Hemiaulaceae	EP00560_Eucampia_antarctica_P003159
AUREO_1b	Diatomista	Mediophyceae	Lithodesmiales	Lithodesmiaceae	EP00565_Helicotheca_tamesis_P000775
AUREO_1b	Diatomista	Mediophyceae	Probosciales	Probosciaceae	EP00592_Proboscia_alata_P009306
AUREO_1b	Diatomista	Mediophyceae	Thalassiosirales	Stephanodiscaceae	EP00804_Cyclotella_cryptica_P018862
AUREO_1b	Diatomista	Mediophyceae	Thalassiosirales	Stephanodiscaceae	EP00804_Cyclotella_cryptica_P018863
AUREO_1b	Diatomista	Mediophyceae	Thalassiosirales	Thalassiosiraceae	EP00569_Conticribra_weissflogii_P018221
AUREO_1b	Diatomista	Mediophyceae	Thalassiosirales	Thalassiosiraceae	EP00579_Thalassiosira_antarctica_P009313
AUREO_1b	Diatomista	Mediophyceae	Thalassiosirales	Thalassiosiraceae	EP01082_Thalassiosira_pseudonana_P003990
AUREO_1c	Chrysista	Chrysophyceae	Ochromonadales	Ochromonadaceae	EP00981_Chlorochromonas_danica_P008427
AUREO_1c	Chrysista	Chrysophyceae	Ochromonadales	Ochromonadaceae	EP01039_Chlorochromonas_danica_P003143
AUREO_1c	Chrysista	Chrysophyceae	Ochromonadales	Ochromonadaceae	EP01040_Poterioochromonas_malhamensis_P005909
AUREO_1c	Chrysista	Chrysophyceae	Ochromonadales	Ochromonadales_clade-VIII	EP00601_Ochromonadales_sp_CCMP2298_P003477
AUREO_1c	Chrysista	Eustigmatophyceae	Eustigmatales	Monodopsidaceae	EP00624_Nannochloropsis_granulata_P004981
AUREO_1c	Chrysista	Phaeophyceae	Ectocarpales	Chordariaceae	EP00752_Nemacystus_decipiens_P002220
AUREO_1c	Chrysista	Phaeophyceae	Ectocarpales	Chordariaceae	EP00752_Nemacystus_decipiens_P002221
AUREO_1c	Chrysista	Phaeophyceae	Ectocarpales	Ectocarpaceae	EP00609_Ectocarpus_siliculosus_P005424
AUREO_1c	Chrysista	Phaeophyceae	Ectocarpales	Ectocarpaceae	EP00903_Cladosiphon_okamuranus_P015253
AUREO_1c	Chrysista	Phaeophyceae	Laminariales	Alariaceae	EP00904_Undaria_pinnatifida_P003124
AUREO_1c	Chrysista	Pinguiophyceae	Pinguiochrysidales	Pinguiochrysidaceae	EP00636_Phaeomonas_parva_P003573
AUREO_1c	Chrysista	Pinguiophyceae	Pinguiochrysidales	Pinguiochrysidaceae	EP00636_Phaeomonas_parva_P011816
AUREO_1c	Chrysista	Pinguiophyceae	Pinguiochrysidales	Pinguiochrysidaceae	EP00968_Pinguiococcus_pyrenoidosus_P001533
AUREO_1c	Chrysista	Pinguiophyceae	Pinguiochrysidales	Pinguiochrysidaceae	EP00968_Pinguiococcus_pyrenoidosus_P006190
AUREO_1c	Chrysista	Raphidophyceae	Chattonellales	Chattonellaceae	EP00638_Chattonella_subsalsa_P000952
AUREO_1c	Chrysista	Raphidophyceae	Chattonellales	Chattonellaceae	EP00639_Heterosigma_akashiwo_P006823
AUREO_1c	Chrysista	Synchromophyceae	Synchromadales	Synchromaceae	EP00608_Synchroma_pusillum_P011743
AUREO_1c	Chrysista	Xanthophyceae	Tribonematales	Tribonemataceae	EP00611_Tribonema_gayanum_P018160
AUREO_1c	Chrysista	Xanthophyceae	Tribonematales	Tribonemataceae	EP00611_Tribonema_gayanum_P022817
AUREO_1c	Chrysista	Xanthophyceae	Vaucheriales	Vaucheriaceae	EP00612_Vaucheria_litorea_P007381
AUREO_1c	Diatomista	Bacillariophyceae	Naviculales	Stauroneidaceae	EP00902_Fistulifera_solaris_P004711
AUREO_1c	Diatomista	Bacillariophyceae	Naviculales	Stauroneidaceae	EP00902_Fistulifera_solaris_P007602
AUREO_1c	Diatomista	Bacillariophyceae	Rhaphoneidales	Asterionellopsidaceae	EP00521_Asterionellopsis_glacialis_P012006
AUREO_1c	Diatomista	Bolidophyceae	Parmales	Triparmaceae	EP00518_Triparma_eleuthera_P000223
AUREO_1c	Diatomista	Coscinodiscophyceae	Corethrales	Corethraceae	EP00587_Corethron_hystrix_P007111
AUREO_1c	Diatomista	Coscinodiscophyceae	Triceratiales	Triceratiaceae	EP00567_Pseudictyota_dubia_P009009
AUREO_1c	Diatomista	Dictyochophyceae	Dictyochales	Dictychaceae	EP00617_Octactis_speculum_P003229
AUREO_1c	Diatomista	Dictyochophyceae	Florenciellales	Floreciellaceae	EP00618_Florenciella_parvula_P008106
AUREO_1c	Diatomista	Dictyochophyceae	Pedinellales	Pedinellaceae	EP00613_Pedinella_sp_CCMP2098_P031398
AUREO_1c	Diatomista	Dictyochophyceae	Pedinellales	Pedinellaceae	EP00613_Pedinella_sp_CCMP2098_P045388
AUREO_1c	Diatomista	Dictyochophyceae	Rhizochromulinales	Rhizochromulinaceae	EP00616_Rhizochromulina_sp_CCMP1243_P016524
AUREO_1c	Diatomista	Mediophyceae	Biddulphiales	Attheyaceae	EP00550_Attheya_septentrionalis_P000792
AUREO_1c	Diatomista	Mediophyceae	Chaetocerotales	Leptocylindraceae	EP00815_Leptocylindrus_aporus_P007757
AUREO_1c	Diatomista	Mediophyceae	Cymatosirales	Cymatosiraceae	EP00561_Arcocellulus_cornucervis_P009879
AUREO_1c	Diatomista	Mediophyceae	Cymatosirales	Cymatosiraceae	EP00562_Extubocellulus_spinifer_P008875
AUREO_1c	Diatomista	Mediophyceae	Cymatosirales	Cymatosiraceae	EP00562_Extubocellulus_spinifer_P022226
AUREO_1c	Diatomista	Mediophyceae	Cymatosirales	Cymatosiraceae	EP00563_Minutocellus_polymorphus_P004948
AUREO_1c	Diatomista	Mediophyceae	Eupodiscales	Odontellaceae	EP00566_Odontella_aurita_P009379
AUREO_1c	Diatomista	Mediophyceae	Eupodiscales	Odontellaceae	EP00566_Odontella_aurita_P013508
AUREO_1c	Diatomista	Mediophyceae	Eupodiscales	Parodontellaceae	EP00568_Trieres_chinensis_P015150
AUREO_1c	Diatomista	Mediophyceae	Probosciales	Probosciaceae	EP00592_Proboscia_alata_P001052
AUREO_1c	Diatomista	Mediophyceae	Thalassiosirales	Skeletonemaceae	EP00984_Skeletonema_dohrnii_P016179
AUREO_1c	Diatomista	Mediophyceae	Thalassiosirales	Thalassiosiraceae	EP00569_Conticribra_weissflogii_P007975
AUREO_1c	Diatomista	Mediophyceae	Thalassiosirales	Thalassiosiraceae	EP00571_Detonula_confervacea_P013329
AUREO_1c	Diatomista	Mediophyceae	Thalassiosirales	Thalassiosiraceae	EP00579_Thalassiosira_antarctica_P007777
AUREO_1c	Diatomista	Mediophyceae	Thalassiosirales	Thalassiosiraceae	EP01082_Thalassiosira_pseudonana_P014350
AUREO_1c	Diatomista	Mediophyceae	Thalassiosirales	Thalassiosiraceae	EP01082_Thalassiosira_pseudonana_P014351
AUREO_1c	Diatomista	Pelagophyceae	Pelagomonadales	Pelagomonadales_clade_A	EP00629_Pelagomonadales_sp_RCC1024_P015417
AUREO_1c	Diatomista	Pelagophyceae	Pelagomonadales	Pelagomonadales_clade_A	EP00629_Pelagomonadales_sp_RCC1024_P017509
AUREO_1c	Diatomista	Pelagophyceae	Pelagophyceae_x	Pelagophyceae_xx	EP00628_Pelagophyceae_sp_CCMP2097_P001907
AUREO_1c	Diatomista	Pelagophyceae	Pelagophyceae_x	Pelagophyceae_xx	EP00628_Pelagophyceae_sp_CCMP2097_P032678
AUREO_1c	Diatomista	Pelagophyceae	Sarcinochrysidales	Chrysocystaceae	EP00630_Chrysocystis_fragilis_P004354
AUREO_1c	Diatomista	Pelagophyceae	Sarcinochrysidales	Sarcinochrysidaceae	EP00632_Arachnochrysis_sp_CCMP2950_P007037
AUREO_1c	Diatomista	Pelagophyceae	Sarcinochrysidales	Sarcinochrysidaceae	EP00633_Aureoumbra_lagunensis_P004458
AUREO_1c	Diatomista	Pelagophyceae	Sarcinochrysidales	Sarcinochrysidaceae	EP00635_Sarcinochrysidales_sp_CCMP3193_P009794
AUREO_2	Chrysista	Chrysophyceae	Chromulinales	Chromulinaceae	EP00595_Chromulina_sp_UTEXLB2642_P001997
AUREO_2	Chrysista	Chrysophyceae	Ochromonadales	Ochromonadaceae	EP00981_Chlorochromonas_danica_P000095
AUREO_2	Chrysista	Chrysophyceae	Ochromonadales	Ochromonadaceae	EP00981_Chlorochromonas_danica_P003871
AUREO_2	Chrysista	Chrysophyceae	Ochromonadales	Ochromonadaceae	EP00981_Chlorochromonas_danica_P015040
AUREO_2	Chrysista	Chrysophyceae	Ochromonadales	Ochromonadaceae	EP01031_Cornospumella_fuschlensis_P022267
AUREO_2	Chrysista	Chrysophyceae	Ochromonadales	Ochromonadaceae	EP01036_Dinobryon_divergens_P033381
AUREO_2	Chrysista	Chrysophyceae	Ochromonadales	Ochromonadaceae	EP01038_Epipyxis_sp_PR26KG_P015221
AUREO_2	Chrysista	Chrysophyceae	Ochromonadales	Ochromonadaceae	EP01039_Chlorochromonas_danica_P003883
AUREO_2	Chrysista	Chrysophyceae	Ochromonadales	Ochromonadaceae	EP01039_Chlorochromonas_danica_P005036
AUREO_2	Chrysista	Chrysophyceae	Ochromonadales	Ochromonadaceae	EP01039_Chlorochromonas_danica_P007395
AUREO_2	Chrysista	Chrysophyceae	Ochromonadales	Ochromonadaceae	EP01039_Chlorochromonas_danica_P014190
AUREO_2	Chrysista	Chrysophyceae	Ochromonadales	Ochromonadaceae	EP01040_Poterioochromonas_malhamensis_P002079
AUREO_2	Chrysista	Chrysophyceae	Ochromonadales	Ochromonadaceae	EP01040_Poterioochromonas_malhamensis_P002366
AUREO_2	Chrysista	Chrysophyceae	Ochromonadales	Ochromonadaceae	EP01040_Poterioochromonas_malhamensis_P014526
AUREO_2	Chrysista	Chrysophyceae	Ochromonadales	Ochromonadaceae	EP01040_Poterioochromonas_malhamensis_P020797
AUREO_2	Chrysista	Chrysophyceae	Ochromonadales	Ochromonadales_clade-VIII	EP00600_Ochromonadales_sp_CCMP1393_P010666
AUREO_2	Chrysista	Chrysophyceae	Ochromonadales	Ochromonadales_clade-VIII	EP00600_Ochromonadales_sp_CCMP1393_P014856
AUREO_2	Chrysista	Chrysophyceae	Ochromonadales	Ochromonadales_clade-VIII	EP00601_Ochromonadales_sp_CCMP2298_P006479
AUREO_2	Chrysista	Chrysophyceae	Ochromonadales	Ochromonadales_clade-VIII	EP00601_Ochromonadales_sp_CCMP2298_P008967
AUREO_2	Chrysista	Chrysophyceae	Synurales	Synuraceae	EP01041_Mallomonas_annulata_P003775
AUREO_2	Chrysista	Chrysophyceae	Synurales	Synuraceae	EP01041_Mallomonas_annulata_P011640
AUREO_2	Chrysista	Phaeophyceae	Ectocarpales	Ectocarpaceae	EP00609_Ectocarpus_siliculosus_P010128
AUREO_2	Chrysista	Pinguiophyceae	Pinguiochrysidales	Pinguiochrysidaceae	EP00636_Phaeomonas_parva_P017878
AUREO_2	Chrysista	Raphidophyceae	Chattonellales	Chattonellaceae	EP00638_Chattonella_subsalsa_P002068
AUREO_2	Chrysista	Raphidophyceae	Chattonellales	Chattonellaceae	EP00638_Chattonella_subsalsa_P009709
AUREO_2	Chrysista	Raphidophyceae	Chattonellales	Chattonellaceae	EP00639_Heterosigma_akashiwo_P036959
AUREO_2	Chrysista	Synchromophyceae	Synchromadales	Synchromaceae	EP00608_Synchroma_pusillum_P004417
AUREO_2	Chrysista	Xanthophyceae	Tribonematales	Heteropediaceae	EP00953_Heterococcus_sp_UTEX-ZZ885_P010324
AUREO_2	Chrysista	Xanthophyceae	Tribonematales	Tribonemataceae	EP00611_Tribonema_gayanum_P012589
AUREO_2	Chrysista	Xanthophyceae	Tribonematales	Tribonemataceae	EP00611_Tribonema_gayanum_P012590
AUREO_2	Chrysista	Xanthophyceae	Vaucheriales	Vaucheriaceae	EP00612_Vaucheria_litorea_P003999
AUREO_2	Diatomista	Bacillariophyceae	Bacillariales	Bacillariaceae	EP00526_Cylindrotheca_closterium_P010036
AUREO_2	Diatomista	Bacillariophyceae	Bacillariales	Bacillariaceae	EP00526_Cylindrotheca_closterium_P010615
AUREO_2	Diatomista	Bacillariophyceae	Bacillariales	Bacillariaceae	EP00526_Cylindrotheca_closterium_P030222
AUREO_2	Diatomista	Bacillariophyceae	Bacillariales	Bacillariaceae	EP00528_Fragilariopsis_cylindrus_P018094
AUREO_2	Diatomista	Bacillariophyceae	Bacillariales	Bacillariaceae	EP00531_Pseudo-nitzschia_arenysensis_P007517
AUREO_2	Diatomista	Bacillariophyceae	Bacillariales	Bacillariaceae	EP00539_Tryblionella_compressa_P018676
AUREO_2	Diatomista	Bacillariophyceae	Cyclophorales	Cyclophoraceae	EP00540_Astrosyne_radiata_P003899
AUREO_2	Diatomista	Bacillariophyceae	Cyclophorales	Cyclophoraceae	EP00540_Astrosyne_radiata_P003999
AUREO_2	Diatomista	Bacillariophyceae	Cyclophorales	Cyclophoraceae	EP00540_Astrosyne_radiata_P004009
AUREO_2	Diatomista	Bacillariophyceae	Cyclophorales	Cyclophoraceae	EP00541_Cyclophora_tenuis_P000893
AUREO_2	Diatomista	Bacillariophyceae	Cyclophorales	Cyclophoraceae	EP00541_Cyclophora_tenuis_P008687
AUREO_2	Diatomista	Bacillariophyceae	Fragilariales	Fragilariaceae	EP00544_Gedaniella_sp_CCMP2646_P011678
AUREO_2	Diatomista	Bacillariophyceae	Fragilariales	Fragilariaceae	EP00545_Synedropsis_sp_CCMP1620_P002946
AUREO_2	Diatomista	Bacillariophyceae	Licmophorales	Licmophoraceae	EP00543_Licmophora_paradoxa_P006507
AUREO_2	Diatomista	Bacillariophyceae	Naviculales	Naviculaceae	EP00797_Seminavis_robusta_P003665
AUREO_2	Diatomista	Bacillariophyceae	Naviculales	Stauroneidaceae	EP00538_Stauroneis_constricta_P002252
AUREO_2	Diatomista	Bacillariophyceae	Naviculales	Stauroneidaceae	EP00902_Fistulifera_solaris_P000075
AUREO_2	Diatomista	Bacillariophyceae	Naviculales	Stauroneidaceae	EP00902_Fistulifera_solaris_P003894
AUREO_2	Diatomista	Bacillariophyceae	Rhabdonematales	Grammatophoraceae	EP00542_Grammatophora_oceanica_P015257
AUREO_2	Diatomista	Bacillariophyceae	Rhaphoneidales	Asterionellopsidaceae	EP00521_Asterionellopsis_glacialis_P007508
AUREO_2	Diatomista	Bacillariophyceae	Striatellales	Striatellaceae	EP00549_Striatella_unipunctata_P007847
AUREO_2	Diatomista	Bacillariophyceae	Surirellales	Entomoneidaceae	EP00522_Entomoneis_paludosa_P001665
AUREO_2	Diatomista	Bacillariophyceae	Surirellales	Entomoneidaceae	EP00522_Entomoneis_paludosa_P002263
AUREO_2	Diatomista	Bacillariophyceae	Thalassionematales	Thalassionemataceae	EP00548_Thalassiothrix_antarctica_P012356
AUREO_2	Diatomista	Bacillariophyceae	Thalassiophysales	Catenulaceae	EP00977_Amphora_coffeiformis_P004099
AUREO_2	Diatomista	Bolidophyceae	Parmales	Triparmaceae	EP00518_Triparma_eleuthera_P013455
AUREO_2	Diatomista	Coscinodiscophyceae	Aulacoseirales	Aulacoseiraceae	EP00590_Aulacoseira_subarctica_P011387
AUREO_2	Diatomista	Coscinodiscophyceae	Corethrales	Corethraceae	EP00587_Corethron_hystrix_P005231
AUREO_2	Diatomista	Coscinodiscophyceae	Coscinodiscales	Coscinodiscaceae	EP00586_Coscinodiscus_wailesii_P021215
AUREO_2	Diatomista	Coscinodiscophyceae	Rhizosoleniales	Rhizosoleniaceae	EP00559_Dactyliosolen_fragilissimus_P002635
AUREO_2	Diatomista	Coscinodiscophyceae	Rhizosoleniales	Rhizosoleniaceae	EP00594_Rhizosolenia_setigera_P008071
AUREO_2	Diatomista	Coscinodiscophyceae	Rhizosoleniales	Rhizosoleniaceae	EP00594_Rhizosolenia_setigera_P008182
AUREO_2	Diatomista	Coscinodiscophyceae	Rhizosoleniales	Rhizosoleniaceae	EP00594_Rhizosolenia_setigera_P011546
AUREO_2	Diatomista	Coscinodiscophyceae	Stephanopyxales	Stephanopyxidaceae	EP00591_Stephanopyxis_turris_P007304
AUREO_2	Diatomista	Coscinodiscophyceae	Stephanopyxales	Stephanopyxidaceae	EP00591_Stephanopyxis_turris_P016463
AUREO_2	Diatomista	Coscinodiscophyceae	Triceratiales	Triceratiaceae	EP00567_Pseudictyota_dubia_P014409
AUREO_2	Diatomista	Dictyochophyceae	Florenciellales	Floreciellaceae	EP00618_Florenciella_parvula_P018151
AUREO_2	Diatomista	Dictyochophyceae	Pedinellales	Pedinellaceae	EP00613_Pedinella_sp_CCMP2098_P050014
AUREO_2	Diatomista	Dictyochophyceae	Pedinellales	Pedinellaceae	EP00614_Pseudopedinella_elastica_P018339
AUREO_2	Diatomista	Dictyochophyceae	Rhizochromulinales	Rhizochromulinaceae	EP00616_Rhizochromulina_sp_CCMP1243_P006646
AUREO_2	Diatomista	Mediophyceae	Biddulphiales	Attheyaceae	EP00550_Attheya_septentrionalis_P000567
AUREO_2	Diatomista	Mediophyceae	Chaetocerotales	Chaetocerotaceae	EP00551_Chaetoceros_affinis_P020193
AUREO_2	Diatomista	Mediophyceae	Chaetocerotales	Chaetocerotaceae	EP00554_Chaetoceros_debilis_P006452
AUREO_2	Diatomista	Mediophyceae	Chaetocerotales	Leptocylindraceae	EP00815_Leptocylindrus_aporus_P004154
AUREO_2	Diatomista	Mediophyceae	Chaetocerotales	Leptocylindraceae	EP00815_Leptocylindrus_aporus_P013106
AUREO_2	Diatomista	Mediophyceae	Cymatosirales	Cymatosiraceae	EP00562_Extubocellulus_spinifer_P002894
AUREO_2	Diatomista	Mediophyceae	Cymatosirales	Cymatosiraceae	EP00563_Minutocellus_polymorphus_P019284
AUREO_2	Diatomista	Mediophyceae	Eupodiscales	Odontellaceae	EP00566_Odontella_aurita_P006214
AUREO_2	Diatomista	Mediophyceae	Eupodiscales	Odontellaceae	EP00566_Odontella_aurita_P006511
AUREO_2	Diatomista	Mediophyceae	Eupodiscales	Odontellaceae	EP00566_Odontella_aurita_P019826
AUREO_2	Diatomista	Mediophyceae	Eupodiscales	Parodontellaceae	EP00568_Trieres_chinensis_P013639
AUREO_2	Diatomista	Mediophyceae	Hemiaulales	Hemiaulaceae	EP00560_Eucampia_antarctica_P008101
AUREO_2	Diatomista	Mediophyceae	Lithodesmiales	Lithodesmiaceae	EP00957_Ditylum_brightwellii_P150245
AUREO_2	Diatomista	Mediophyceae	Probosciales	Probosciaceae	EP00592_Proboscia_alata_P010791
AUREO_2	Diatomista	Mediophyceae	Thalassiosirales	Skeletonemaceae	EP00984_Skeletonema_dohrnii_P035203
AUREO_2	Diatomista	Mediophyceae	Thalassiosirales	Stephanodiscaceae	EP00804_Cyclotella_cryptica_P025486
AUREO_2	Diatomista	Mediophyceae	Thalassiosirales	Thalassiosiraceae	EP00569_Conticribra_weissflogii_P006650
AUREO_2	Diatomista	Mediophyceae	Thalassiosirales	Thalassiosiraceae	EP00571_Detonula_confervacea_P003193
AUREO_2	Diatomista	Mediophyceae	Thalassiosirales	Thalassiosiraceae	EP00579_Thalassiosira_antarctica_P020571
AUREO_2	Diatomista	Mediophyceae	Thalassiosirales	Thalassiosiraceae	EP01082_Thalassiosira_pseudonana_P013923
AUREO_2	Diatomista	Pelagophyceae	Pelagomonadales	Pelagomonadales_clade_A	EP00629_Pelagomonadales_sp_RCC1024_P017721
AUREO_2	Diatomista	Pelagophyceae	Pelagophyceae_x	Pelagophyceae_xx	EP00628_Pelagophyceae_sp_CCMP2097_P029327
AUREO_2	Diatomista	Pelagophyceae	Sarcinochrysidales	Sarcinochrysidaceae	EP00633_Aureoumbra_lagunensis_P003786
AUREO_2	Diatomista	Pelagophyceae	Sarcinochrysidales	Sarcinochrysidaceae	EP00635_Sarcinochrysidales_sp_CCMP3193_P000990
AUREO_2	Opalzoa	Bikosia	Anoecales	Incisomonadidae	EP00750_Incisomonas_marina_P013512
AUREO_2	Opalzoa	Bikosia	Anoecales	Incisomonadidae	EP00750_Incisomonas_marina_P015402
early_div_AUREO	Diatomista	Dictyochophyceae	Dictyochales	Dictychaceae	EP00617_Octactis_speculum_P020135
early_div_AUREO	Diatomista	Dictyochophyceae	Dictyochales	Dictychaceae	EP00617_Octactis_speculum_P023006
early_div_AUREO	Diatomista	Pelagophyceae	Sarcinochrysidales	Chrysocystaceae	EP00630_Chrysocystis_fragilis_P010926
early_div_AUREO	Diatomista	Pelagophyceae	Sarcinochrysidales	Sarcinochrysidaceae	EP00633_Aureoumbra_lagunensis_P007401
early_div_AUREO	Opalzoa	Bikosia	Anoecales	Cafeteriaceae	EP00749_Cafeteria_burkhardae_P001338
early_div_AUREO	Opalzoa	Bikosia	Bicoecales	Bicoecaceae	EP01138_Halocafeteria_seosinensis_P006442
early_div_AUREO	Opalzoa	Bikosia	Bicoecales	Bicoecaceae	EP01138_Halocafeteria_seosinensis_P014656
early_div_AUREO	Placidozoa-Opalozoa	Nanomonadea	Nanomonadea	MAST-3	EP00938_MAST-03A_sp_MAST-3A-sp1_P003094
early_div_AUREO	Placidozoa-Opalozoa	Nanomonadea	Nanomonadea	MAST-3	EP00940_MAST-03C_sp_MAST-3C-sp2_P001798
early_div_AUREO	Stramenopiles_incertae_sedis	Stramenopiles_incertae_sedis	Stramenopiles_incertae_sedis	Platysulcidae	EP00753_Platysulcus_tardus_P019787
